# Supplementary material for: Integrated Analysis of Ferroptosis-Related Biomarker Signatures to Improve the Diagnosis and Prognosis Prediction of Ovarian Cancer
Source: Front Cell Dev Biol. 2022 Jan 5;9:807862. doi: 10.3389/fcell.2021.807862 (PMC8766510; doi:10.3389/fcell.2021.807862)
Supplement: Supplementary file 3 [file Table5.XLS]

## Sheet: GOMF_GSEA_DEG_all
The detailed results of GSEA(GO_MF).
ID	Description	setSize	enrichmentScore	NES	p value	p.adjust	q values	rank	leading_edge	core_enrichment
GO:0019001	guanyl nucleotide binding	393	0.49308	1.32872	0.00100604	0.00248452	0.000845738	8133	tags=43%, list=22%, signal=34%	EHD2/DAPK1/RAB31/TUBB2B/GNA12/TGM2/ANXA6/ARHGAP35/RHOBTB1/RHOBTB3/TUBA1A/SEPTIN11/RAB23/KRAS/DIRAS3/RASL11B/SEPTIN8/RASL12/SEPTIN9/MFN2/RAB15/RASD2/EEF1A2/AGAP1/MRAS/RHOB/RHOBTB2/EHD3/GIMAP6/IRGQ/TUBB2A/RHOU/TSR1/CPLANE2/RAB35/SCG5/TUBB6/NPR2/GIMAP8/RAB29/RAB5C/GEM/GTPBP1/RAB8B/RAB3D/GSPT2/GNA15/DNM1/RERG/TUBG2/GUCY1A1/RAB14/ARL10/HHAT/INSR/EHD4/EEF2/DNM2/SEPTIN5/SAMHD1/RASL10B/GNAZ/NOLC1/RAB3B/R…
GO:0032561	guanyl ribonucleotide binding	393	0.49308	1.32872	0.00100604	0.00248452	0.000845738	8133	tags=43%, list=22%, signal=34%	EHD2/DAPK1/RAB31/TUBB2B/GNA12/TGM2/ANXA6/ARHGAP35/RHOBTB1/RHOBTB3/TUBA1A/SEPTIN11/RAB23/KRAS/DIRAS3/RASL11B/SEPTIN8/RASL12/SEPTIN9/MFN2/RAB15/RASD2/EEF1A2/AGAP1/MRAS/RHOB/RHOBTB2/EHD3/GIMAP6/IRGQ/TUBB2A/RHOU/TSR1/CPLANE2/RAB35/SCG5/TUBB6/NPR2/GIMAP8/RAB29/RAB5C/GEM/GTPBP1/RAB8B/RAB3D/GSPT2/GNA15/DNM1/RERG/TUBG2/GUCY1A1/RAB14/ARL10/HHAT/INSR/EHD4/EEF2/DNM2/SEPTIN5/SAMHD1/RASL10B/GNAZ/NOLC1/RAB3B/R…
GO:0001883	purine nucleoside binding	380	0.49425	1.33036	0.0010101	0.00248452	0.000845738	8133	tags=43%, list=22%, signal=34%	EHD2/DAPK1/RAB31/TUBB2B/GNA12/TGM2/ANXA6/ARHGAP35/RHOBTB1/RHOBTB3/TUBA1A/SEPTIN11/RAB23/KRAS/DIRAS3/RASL11B/SEPTIN8/RASL12/SEPTIN9/MFN2/RAB15/RASD2/EEF1A2/AGAP1/MRAS/RHOB/RHOBTB2/EHD3/GIMAP6/IRGQ/TUBB2A/RHOU/TSR1/CPLANE2/RAB35/SCG5/TUBB6/NPR2/GIMAP8/RAB29/RAB5C/GEM/GTPBP1/RAB8B/RAB3D/GSPT2/GNA15/DNM1/RERG/TUBG2/GUCY1A1/RAB14/ARL10/HHAT/INSR/EHD4/EEF2/DNM2/SEPTIN5/SAMHD1/RASL10B/GNAZ/NOLC1/RAB3B/R…
GO:0032550	purine ribonucleoside binding	377	0.494686	1.33113	0.0010101	0.00248452	0.000845738	8133	tags=43%, list=22%, signal=34%	EHD2/DAPK1/RAB31/TUBB2B/GNA12/TGM2/ANXA6/ARHGAP35/RHOBTB1/RHOBTB3/TUBA1A/SEPTIN11/RAB23/KRAS/DIRAS3/RASL11B/SEPTIN8/RASL12/SEPTIN9/MFN2/RAB15/RASD2/EEF1A2/AGAP1/MRAS/RHOB/RHOBTB2/EHD3/GIMAP6/IRGQ/TUBB2A/RHOU/TSR1/CPLANE2/RAB35/SCG5/TUBB6/NPR2/GIMAP8/RAB29/RAB5C/GEM/GTPBP1/RAB8B/RAB3D/GSPT2/GNA15/DNM1/RERG/TUBG2/GUCY1A1/RAB14/ARL10/HHAT/INSR/EHD4/EEF2/DNM2/SEPTIN5/SAMHD1/RASL10B/GNAZ/NOLC1/RAB3B/R…
GO:0033218	amide binding	353	0.495966	1.33274	0.00100705	0.00248452	0.000845738	7068	tags=39%, list=19%, signal=32%	HSPG2/LRP1/POM121/FOLR2/IGF1R/SLC7A5/ITGB2/ITM2C/POM121C/CEMIP/TLR4/CD209/EPHB2/RXRA/AP2B1/SCARB1/TNPO2/PEX5/CD14/ECE1/ITGAM/NUP98/MME/PIK3R1/NGFR/FASN/APBB1/APBB2/CLSTN1/MAML1/PSAP/FURIN/SORL1/PTH1R/INHBA/LDLRAD3/APBA2/LANCL1/TPP1/GPR1/BACE1/KDELR2/SLC40A1/MARCO/ADCYAP1R1/ACACB/TLR2/TLR1/ADNP/CLIP3/SLC46A1/ITM2A/OPRL1/SEC61A1/TMEM158/NPR2/PTGES/PICALM/GSTM3/FBXO2/LDLRAP1/RAMP1/PCSK5/HLCS/ACOT11/…
GO:0003924	GTPase activity	322	0.49946	1.33822	0.0010142	0.00248452	0.000845738	8504	tags=45%, list=23%, signal=35%	RAB31/TUBB2B/GNA12/ARHGAP35/RHOBTB1/RHOBTB3/TUBA1A/SEPTIN11/RGS4/RAB23/KRAS/DIRAS3/RASL11B/SEPTIN8/RASL12/SEPTIN9/MFN2/RAB15/RASD2/GNG4/EEF1A2/RASA1/AGAP1/MRAS/RHOB/RHOBTB2/RGS16/TUBB2A/GNG2/RHOU/TSR1/CPLANE2/RAB35/TUBB6/RAB29/RAB5C/GEM/GTPBP1/RAB8B/RGS2/RAB3D/GSPT2/RGS5/GNA15/DNM1/TMEM250/RERG/TUBG2/RAB14/EEF2/DNM2/SEPTIN5/RASL10B/GNAZ/RAB3B/RAB43/GNB3/SEPTIN10/GNA11/RHOJ/EFTUD2/TUBA3D/DDX3X/RGS…
GO:0001882	nucleoside binding	387	0.496663	1.33894	0.00100503	0.00248452	0.000845738	8064	tags=43%, list=22%, signal=34%	EHD2/DAPK1/RAB31/TUBB2B/GNA12/TGM2/ANXA6/ARHGAP35/RHOBTB1/RHOBTB3/TUBA1A/SEPTIN11/RAB23/KRAS/DIRAS3/RASL11B/SEPTIN8/RASL12/SEPTIN9/MFN2/RAB15/RASD2/EEF1A2/AGAP1/MRAS/RHOB/RHOBTB2/EHD3/GIMAP6/IRGQ/TUBB2A/RHOU/TSR1/CPLANE2/RAB35/SCG5/TUBB6/NPR2/GIMAP8/RAB29/RAB5C/GEM/GTPBP1/RAB8B/RAB3D/GSPT2/GNA15/DNM1/RERG/TUBG2/GUCY1A1/ACTN4/RAB14/ARL10/HHAT/INSR/EHD4/EEF2/DNM2/SEPTIN5/POLR3B/SAMHD1/RASL10B/GNAZ/…
GO:0032549	ribonucleoside binding	380	0.497796	1.33991	0.0010101	0.00248452	0.000845738	8133	tags=44%, list=22%, signal=35%	EHD2/DAPK1/RAB31/TUBB2B/GNA12/TGM2/ANXA6/ARHGAP35/RHOBTB1/RHOBTB3/TUBA1A/SEPTIN11/RAB23/KRAS/DIRAS3/RASL11B/SEPTIN8/RASL12/SEPTIN9/MFN2/RAB15/RASD2/EEF1A2/AGAP1/MRAS/RHOB/RHOBTB2/EHD3/GIMAP6/IRGQ/TUBB2A/RHOU/TSR1/CPLANE2/RAB35/SCG5/TUBB6/NPR2/GIMAP8/RAB29/RAB5C/GEM/GTPBP1/RAB8B/RAB3D/GSPT2/GNA15/DNM1/RERG/TUBG2/GUCY1A1/RAB14/ARL10/HHAT/INSR/EHD4/EEF2/DNM2/SEPTIN5/POLR3B/SAMHD1/RASL10B/GNAZ/NOLC1/…
GO:0005525	GTP binding	373	0.502579	1.35271	0.00100807	0.00248452	0.000845738	8133	tags=43%, list=22%, signal=34%	EHD2/DAPK1/RAB31/TUBB2B/GNA12/TGM2/ANXA6/ARHGAP35/RHOBTB1/RHOBTB3/TUBA1A/SEPTIN11/RAB23/KRAS/DIRAS3/RASL11B/SEPTIN8/RASL12/SEPTIN9/MFN2/RAB15/RASD2/EEF1A2/AGAP1/MRAS/RHOB/RHOBTB2/EHD3/GIMAP6/IRGQ/TUBB2A/RHOU/TSR1/CPLANE2/RAB35/SCG5/TUBB6/NPR2/GIMAP8/RAB29/RAB5C/GEM/GTPBP1/RAB8B/RAB3D/GSPT2/GNA15/DNM1/RERG/TUBG2/GUCY1A1/RAB14/ARL10/HHAT/INSR/EHD4/EEF2/DNM2/SEPTIN5/SAMHD1/RASL10B/GNAZ/NOLC1/RAB3B/R…
GO:0022804	active transmembrane transporter activity	348	0.508322	1.3655	0.00100908	0.00248452	0.000845738	8822	tags=43%, list=24%, signal=33%	SLCO2B1/SLC2A10/SLC35E2B/SLC36A1/SLC41A1/SLC16A2/CLCN7/SLCO2A1/CLCN6/SLC45A3/SLC12A4/SLC23A2/ABCC1/SLC29A4/SLC8B1/ATP6V0A1/SLC12A8/ABCA2/SLC6A6/SLC9A8/SLC9A1/ABCC10/ATP2A3/SLC35E2A/SLC4A3/ATP1A1/ATP2B4/SLC24A3/SLC6A12/SLC37A2/SLC35E1/SLC4A11/SLC12A7/SLC9A9/SLC12A9/SLC16A13/SLC45A4/ATP1A2/ATP7B/CLCN4/SLC35C1/ABCA3/ATP2A2/ATP13A2/SLC15A4/SLC16A3/SLC17A5/PCYOX1/SLC26A1/SLC9A2/ABCA1/SLC16A4/ABCC3/CLC…
GO:0019787	ubiquitin-like protein transferase activity	407	0.512591	1.38205	0.00100604	0.00248452	0.000845738	8857	tags=54%, list=24%, signal=42%	FBXL14/FBXL7/SH3RF3/EGR2/DTX4/UBR4/FBXL18/HECTD4/PIAS3/MED1/ZMIZ1/NCCRP1/FBXO11/UBE4B/RNF216/RNF40/PDZRN3/RNF144A/BCOR/TRAF3/HUWE1/AREL1/UBE4A/RNF31/TRIM68/FBXW8/RNF123/FBXO27/UBE3B/TNFAIP1/TRAF7/PDZD4/SMURF1/HDAC4/BIRC6/TTC3/SEL1L/WWP2/TRIP12/BTRC/ZMIZ2/HERC1/MARCHF8/FBXW11/TAF1/RNF38/TRIM62/NEURL4/CBL/KCTD10/HERC2/TNFAIP3/MAGEL2/VHL/KLHL21/FEM1B/ZBED1/ZNF598/TRIM25/MIB1/NEURL1B/RNF213/RNF24/RNF…
GO:0022853	active ion transmembrane transporter activity	236	0.522684	1.38824	0.00103306	0.00248452	0.000845738	8822	tags=41%, list=24%, signal=32%	SLCO2B1/SLC2A10/SLC36A1/SLC41A1/SLCO2A1/SLC45A3/SLC12A4/SLC23A2/SLC8B1/ATP6V0A1/SLC12A8/SLC6A6/SLC9A8/SLC9A1/ATP2A3/SLC4A3/ATP1A1/ATP2B4/SLC24A3/SLC6A12/SLC37A2/SLC4A11/SLC12A7/SLC9A9/SLC12A9/SLC45A4/ATP1A2/ATP7B/CLCN4/ATP2A2/ATP13A2/SLC15A4/SLC17A5/PCYOX1/SLC26A1/SLC9A2/ABCC3/CLCN3/SLC12A6/SLC19A1/SLC6A9/SLC45A1/SLC26A2/SLC9A3/CLCN5/SLC24A1/SLC11A2/ATP6V0A2/SLC20A1/SLC22A3/SLC4A2/TCIRG1/ATP1B2/L…
GO:0004842	ubiquitin-protein transferase activity	382	0.51651	1.39081	0.00100908	0.00248452	0.000845738	8857	tags=54%, list=24%, signal=42%	FBXL14/FBXL7/SH3RF3/DTX4/UBR4/FBXL18/HECTD4/MED1/NCCRP1/FBXO11/UBE4B/RNF216/RNF40/PDZRN3/RNF144A/BCOR/TRAF3/HUWE1/AREL1/UBE4A/RNF31/TRIM68/FBXW8/RNF123/FBXO27/UBE3B/TNFAIP1/TRAF7/PDZD4/SMURF1/BIRC6/TTC3/SEL1L/WWP2/TRIP12/BTRC/HERC1/MARCHF8/FBXW11/TAF1/RNF38/TRIM62/NEURL4/CBL/KCTD10/HERC2/TNFAIP3/MAGEL2/VHL/KLHL21/FEM1B/ZNF598/TRIM25/MIB1/NEURL1B/RNF213/RNF24/RNF111/RNF157/RNF26/MGRN1/ANKIB1/MYCBP…
GO:0015631	tubulin binding	335	0.520969	1.39779	0.00101215	0.00248452	0.000845738	7430	tags=49%, list=20%, signal=39%	KIF26B/KIF1A/CLIP2/TRPV4/NDN/RAB11FIP5/MAP1A/GJA1/KIF1B/MAP4/MACF1/KIFC3/STIM1/NEFH/SUN2/LZTS1/CCDC69/KIF1C/CCDC88C/DPYSL2/MTUS1/MAP4K4/GABARAPL1/KIF2A/KIF13B/HTT/FYN/DAG1/PAFAH1B1/CAMSAP1/KIF3C/MAPRE2/STMN3/EML4/KIF13A/KIF26A/SYT11/KIF7/MAP6/BCL2L11/KIF3B/TAOK1/HOOK2/CLASP1/ADNP/VPS41/CLIP3/HDAC6/NUMA1/TUBGCP6/GOLGA2/DCTN1/DIXDC1/MAP1B/KIF5C/RGS2/TTLL4/RCC2/FEZ1/INO80/AGBL5/DST/MAST2/DYSF/DNM1/C…
GO:0045296	cadherin binding	329	0.524108	1.40618	0.00101112	0.00248452	0.000845738	6828	tags=51%, list=18%, signal=42%	CDH11/ERC1/PPL/FSCN1/CDH3/GCN1/NOTCH3/GOLGA3/SPTBN1/PKP2/ITGB1/AHNAK/HCFC1/CNN2/MACF1/PPFIBP1/CEMIP2/HSPA8/PTPRJ/MPRIP/PARVA/LIMA1/LASP1/CALD1/EGFR/PI4KA/PLEC/SRC/MICALL1/CTNNB1/MMP24/HDLBP/SPTBN2/SEPTIN9/CTNND1/FLNB/DAB2IP/CGN/FASN/PROM1/TNKS1BP1/FLNA/TLN1/EPHA2/MYH9/ARHGAP18/CDH1/GPRC5A/CDH5/MYO1B/AFDN/STK38/PTPN1/PTPRT/EIF4G2/VASN/ADD1/PTPRM/VCL/CRKL/MRTFB/EPN2/ITGA6/WASF2/NIBAN2/LARP1/KDR/CBL…
GO:0042393	histone binding	196	0.532976	1.40948	0.00104058	0.00248452	0.000845738	7686	tags=48%, list=21%, signal=39%	MCM3AP/KMT2D/MLLT6/SMARCA2/PHF2/KDM4A/TP53BP1/BAZ2A/NCAPD2/KDM5A/KDM5B/PHF8/SUPT6H/SMARCA4/CHD8/KMT2C/LEF1/APBB1/SMARCC2/BRD1/KAT6A/BRD3/KMT2A/YEATS2/SRCAP/TAF1/SPTY2D1/EZH1/CARM1/SMARCC1/GLYR1/SPHK2/INO80/TBL1X/WDTC1/KAT6B/PYGO1/IPO7/RNF20/SPIN1/SFMBT1/KMT2E/SFMBT2/CBX2/BCAS3/MSH6/ING5/PSME4/PHF13/CHD2/NCAPD3/GRWD1/BRD4/ZMYND8/KDM1B/USP3/CDYL2/ING4/RBBP5/PHF10/SART3/PRKCB/TNKS/KDM7A/SAP30L/KAT7/…
GO:0042277	peptide binding	293	0.527344	1.41026	0.00102145	0.00248452	0.000845738	6534	tags=38%, list=17%, signal=32%	HSPG2/LRP1/POM121/IGF1R/SLC7A5/ITGB2/ITM2C/POM121C/CEMIP/TLR4/CD209/EPHB2/RXRA/AP2B1/SCARB1/TNPO2/PEX5/CD14/ECE1/ITGAM/NUP98/MME/PIK3R1/NGFR/APBB1/APBB2/CLSTN1/MAML1/FURIN/SORL1/PTH1R/INHBA/LDLRAD3/APBA2/LANCL1/TPP1/GPR1/BACE1/KDELR2/SLC40A1/MARCO/ADCYAP1R1/TLR2/TLR1/ADNP/ITM2A/OPRL1/SEC61A1/TMEM158/NPR2/PTGES/PICALM/GSTM3/FBXO2/LDLRAP1/RAMP1/PCSK5/KDELR3/SLC7A8/INSR/LDLR/TGFB2/ITGA2/CD36/GHR/PRN…
GO:0061630	ubiquitin protein ligase activity	221	0.531579	1.41109	0.0010352	0.00248452	0.000845738	10115	tags=62%, list=27%, signal=46%	SH3RF3/FBXL18/MED1/NCCRP1/UBE4B/RNF216/PDZRN3/RNF144A/HUWE1/AREL1/UBE4A/FBXO27/PDZD4/SMURF1/WWP2/BTRC/FBXW11/NEURL4/CBL/VHL/ZNF598/TRIM25/NEURL1B/RNF24/RNF111/RNF157/RNF26/MGRN1/ANKIB1/MYCBP2/FBXO17/TRIM32/ITCH/RNF43/ANAPC1/MSL2/PELI1/FBXO2/RFFL/CHFR/MED12/UBR1/TRIM58/SH3RF1/TRIM6/RNF41/UBE2O/MDM2/PPIL2/MED21/ARIH2/UBR5/IRF2BPL/RNF121/NEURL1/RNF145/PJA1/FBXL22/CBLL1/NEDD4L/SH3RF2/MIB2/GID4/PJA2/B…
GO:0016791	phosphatase activity	268	0.531369	1.4159	0.00102564	0.00248452	0.000845738	8119	tags=50%, list=22%, signal=39%	NT5E/PTPRU/DUSP16/PLPP3/NT5C2/CTDSP2/SSH1/DUSP1/TNS2/PTPRJ/PTPRF/PALD1/SBF1/SGPP2/LPIN2/PLPPR2/PLPP1/PFKFB3/PTPN23/LPIN3/PTPN21/PPM1H/SYNJ2/PTPN1/PTPRT/OCRL/ATP1A1/TIGAR/MTMR4/PTPRM/PTPRK/ALPP/PPP1R3B/PTPRS/DUSP7/PTPN11/PPP1R3C/INPP5D/PTPN13/CTDSPL/PTPN3/PPP4R1/PTPRG/PTPRC/PPM1F/SGPP1/EYA3/PFKFB4/PFKFB2/INPP5F/PTPN14/CTDP1/DUSP3/PTPRA/DUSP4/PLPPR4/SYNJ1/PTPRD/EYA4/INPP5B/INPP5A/PTPRE/DUSP8/PIKFYV…
GO:0008017	microtubule binding	246	0.537809	1.42873	0.00103413	0.00248452	0.000845738	8178	tags=52%, list=22%, signal=41%	KIF26B/KIF1A/CLIP2/TRPV4/MAP1A/KIF1B/MAP4/MACF1/KIFC3/STIM1/NEFH/SUN2/LZTS1/CCDC69/KIF1C/CCDC88C/DPYSL2/MTUS1/MAP4K4/KIF2A/KIF13B/PAFAH1B1/CAMSAP1/KIF3C/MAPRE2/EML4/KIF13A/KIF26A/KIF7/MAP6/BCL2L11/KIF3B/HOOK2/CLASP1/VPS41/CLIP3/HDAC6/NUMA1/TUBGCP6/GOLGA2/DCTN1/MAP1B/KIF5C/RCC2/DST/MAST2/DYSF/DNM1/CLIP1/MAPRE3/DNM2/MID2/PRNP/MID1/KRIT1/SPAST/CAPN6/CDK5RAP2/NDE1/CFAP157/EML1/APC/KIF16B/MARK4/KATNB1…
GO:0008514	organic anion transmembrane transporter activity	210	0.539889	1.43051	0.00103199	0.00248452	0.000845738	9529	tags=43%, list=25%, signal=32%	SLCO2B1/SLC7A5/SLC36A1/SLC16A2/SLCO2A1/SLC7A2/SFXN3/SLC23A2/ABCC1/SLC25A25/SLC6A6/SLC7A4/SLC7A1/CTNS/SLC27A1/SLC6A12/SLC43A1/SLC37A2/SLC7A7/SLC43A2/SLC4A11/SLC46A1/SLC16A13/SLC38A7/SLC38A5/SLC35A5/SLC38A10/SLC15A4/SLC16A3/SLC17A5/SLC25A13/SLC26A1/SLC16A4/ABCC3/SLC1A4/SLC7A8/SLC19A1/SLC6A9/SLC26A2/SLC2A1/ABCC5/SLC7A6/SLC19A2/SLC52A3/SLC38A3/SLC38A9/SLC25A42/SLC25A15/SLC1A1/SLC16A11/SLC6A11/SLC4A4/…
GO:0061659	ubiquitin-like protein ligase activity	230	0.543619	1.44523	0.00103199	0.00248452	0.000845738	9765	tags=61%, list=26%, signal=45%	SH3RF3/EGR2/FBXL18/PIAS3/MED1/ZMIZ1/NCCRP1/UBE4B/RNF216/PDZRN3/RNF144A/HUWE1/AREL1/UBE4A/FBXO27/PDZD4/SMURF1/WWP2/BTRC/ZMIZ2/FBXW11/NEURL4/CBL/VHL/ZNF598/TRIM25/NEURL1B/RNF24/RNF111/RNF157/RNF26/MGRN1/ANKIB1/MYCBP2/FBXO17/TRIM32/ITCH/RNF43/ANAPC1/MSL2/PELI1/FBXO2/RFFL/CHFR/MED12/UBR1/TRIM58/SH3RF1/TRIM6/RNF41/UBE2O/MDM2/PPIL2/MED21/ARIH2/UBR5/IRF2BPL/RNF121/NEURL1/RNF145/PJA1/FBXL22/CBLL1/NEDD4L/…
GO:0022843	voltage-gated cation channel activity	142	0.56008	1.45547	0.00106157	0.00248452	0.000845738	11421	tags=56%, list=31%, signal=39%	KCNQ1/CACNG4/CACNA1H/KCNE4/KCNC3/KCNJ12/TPCN1/KCNAB2/PKD2/KCND1/KCNK3/CACNA1G/CACNB3/CACNA1C/ITGAV/KCNG1/KCNJ5/KCNS1/CACHD1/KCNMA1/TSPOAP1/KCNK2/KCNK6/RYR1/PTK2B/TPCN2/KCNS3/KCND3/CACNA2D2/KCNF1/KCNB1/CACNB1/CACNA1D/ANXA2P2/KCNT1/KCNJ8/KCNE5/KCNQ4/HVCN1/KCNAB3/KCNC4/KCNQ3/LRRC55/KCNH3/SNAP25/KCNA5/KCNT2/HCN4/KCNAB1/KCNJ14/HCN3/CACNA2D4/CNR1/GRIN2D/GRIN2A/KCNK5/KCNJ15/KCNA3/KCNG3/GAS6/ANXA2/KCNJ2/…
GO:0008509	anion transmembrane transporter activity	336	0.54536	1.46337	0.00101215	0.00248452	0.000845738	9529	tags=44%, list=25%, signal=33%	TTYH3/SLCO2B1/CLIC6/SLC7A5/SLC36A1/ANO1/SLC16A2/CLCN7/SLCO2A1/SLC7A2/CLCN6/SLC12A4/SFXN3/ANO6/SLC23A2/ABCC1/TTYH2/SLC12A8/SLC25A25/SLC6A6/SLC9A8/SLC9A1/SLC7A4/SLC7A1/SLC4A3/ANO8/CTNS/SLC27A1/SLC24A3/SLC6A12/SLC43A1/SLC37A2/CLIC4/SLC7A7/LRRC8A/SLC43A2/SLC4A11/SLC12A7/SLC9A9/SLC12A9/SLC46A1/SLC16A13/SLC38A7/CLCN4/SLC38A5/SLC35A5/CLIC5/SLC38A10/SLC15A4/SLC16A3/SLC17A5/PCYOX1/SLC25A13/SLC26A1/SLC9A2/…
GO:0042578	phosphoric ester hydrolase activity	365	0.549501	1.47933	0.00100503	0.00248452	0.000845738	9536	tags=60%, list=25%, signal=45%	NT5E/PLCG1/PTPRU/DUSP16/PLPP3/NT5C2/HMOX1/CTDSP2/SSH1/DUSP1/TNS2/PTPRJ/SMPD1/PTPRF/PALD1/EDNRA/ENPP1/SBF1/SGPP2/LPIN2/PLPPR2/PLPP1/PFKFB3/PTPN23/LPIN3/PTPN21/PPM1H/SYNJ2/PDE4A/PTPN1/PTPRT/OCRL/ATP1A1/TIGAR/PLD2/MTMR4/PTPRM/SMPD4/PTPRK/ALPP/PPP1R3B/PTPRS/DUSP7/PTPN11/PPP1R3C/GDPD5/INPP5D/FAN1/ENPP2/PTPN13/CTDSPL/PTPN3/PPP4R1/PLCE1/PTPRG/PTPRC/PPM1F/PLCL2/SGPP1/EYA3/PFKFB4/PFKFB2/CCR1/INPP5F/PTPN14…
GO:0005244	voltage-gated ion channel activity	197	0.559824	1.48162	0.00103842	0.00248452	0.000845738	8457	tags=43%, list=23%, signal=33%	CLIC6/CYBB/KCNQ1/ANO1/CACNG4/CLCN7/CACNA1H/CLCN6/ANO6/KCNE4/KCNC3/KCNJ12/TPCN1/TMEM37/CLIC4/KCNAB2/PKD2/KCND1/KCNK3/CACNA1G/KCNIP1/CLCN4/CLIC5/CACNB3/CACNA1C/CLCN3/ITGAV/KCNG1/KCNJ5/KCNS1/CLCN5/CACHD1/KCNMA1/TSPOAP1/KCNK2/KCNK13/CLCNKB/TMEM109/KCNK6/RYR1/PTK2B/TPCN2/KCNS3/SCN3B/KCND3/SCN5A/CACNA2D2/KCNF1/SCN1B/KCNB1/CACNB1/SCN2B/SCN4B/CACNA1D/ANXA2P2/KCNT1/KCNJ8/KCNE5/KCNQ4/HVCN1/KCNAB3/KCNC4/KCN…
GO:0022832	voltage-gated channel activity	197	0.559824	1.48162	0.00103842	0.00248452	0.000845738	8457	tags=43%, list=23%, signal=33%	CLIC6/CYBB/KCNQ1/ANO1/CACNG4/CLCN7/CACNA1H/CLCN6/ANO6/KCNE4/KCNC3/KCNJ12/TPCN1/TMEM37/CLIC4/KCNAB2/PKD2/KCND1/KCNK3/CACNA1G/KCNIP1/CLCN4/CLIC5/CACNB3/CACNA1C/CLCN3/ITGAV/KCNG1/KCNJ5/KCNS1/CLCN5/CACHD1/KCNMA1/TSPOAP1/KCNK2/KCNK13/CLCNKB/TMEM109/KCNK6/RYR1/PTK2B/TPCN2/KCNS3/SCN3B/KCND3/SCN5A/CACNA2D2/KCNF1/SCN1B/KCNB1/CACNB1/SCN2B/SCN4B/CACNA1D/ANXA2P2/KCNT1/KCNJ8/KCNE5/KCNQ4/HVCN1/KCNAB3/KCNC4/KCN…
GO:0008022	protein C-terminus binding	187	0.562959	1.48363	0.00104712	0.00248452	0.000845738	7203	tags=51%, list=19%, signal=41%	HSPG2/FN1/CCN2/SDC1/FBLN1/DAB2/POLR2A/FBLN5/ECM1/SASH1/SHANK3/PIAS3/EP300/HSPB7/SRC/EPB41/CTNNB1/CNRIP1/MYO1C/DLG4/ABL1/KSR1/AFDN/LAMA1/ERBB2/NCF2/ATXN1/AP2A1/ERCC2/CEP250/TCF4/NUMA1/YAP1/OPRL1/PRRC2C/GRIP1/KCNK3/FOXN3/MPDZ/TBL1X/DST/VPS4B/MDC1/SYT1/HIC2/DNM1/MED12/MAPRE3/SREBF2/CALCOCO1/ERCC3/ATXN2/MAGI1/ERCC4/MKI67/CEP120/PTK2B/KPNA3/EFHC1/PEX12/SP1/PRKAA1/DBNL/HPCAL4/PIAS1/SHANK1/NPAT/PFKM/TOP…
GO:0005342	organic acid transmembrane transporter activity	153	0.56777	1.48491	0.00104932	0.00248452	0.000845738	9242	tags=45%, list=25%, signal=34%	SLCO2B1/SLC7A5/SLC36A1/SLC16A2/SLCO2A1/SLC7A2/SFXN3/SLC23A2/SLC6A6/SLC7A4/SLC7A1/CTNS/SLC27A1/SLC6A12/SLC43A1/SLC7A7/SLC43A2/SLC46A1/SLC16A13/SLC38A7/SLC38A5/SLC35A5/SLC38A10/SLC15A4/SLC16A3/SLC17A5/SLC25A13/SLC26A1/SLC16A4/ABCC3/SLC1A4/SLC7A8/SLC19A1/SLC6A9/SLC26A2/SLC7A6/SLC19A2/SLC38A3/SLC38A9/SLC25A15/SLC1A1/SLC16A11/SLC6A11/MFSD2A/SLC25A29/SLC16A5/SLC16A8/SLC25A30/SLC25A22/SLC7A10/SLC38A8/SF…
GO:0046943	carboxylic acid transmembrane transporter activity	153	0.56777	1.48491	0.00104932	0.00248452	0.000845738	9242	tags=45%, list=25%, signal=34%	SLCO2B1/SLC7A5/SLC36A1/SLC16A2/SLCO2A1/SLC7A2/SFXN3/SLC23A2/SLC6A6/SLC7A4/SLC7A1/CTNS/SLC27A1/SLC6A12/SLC43A1/SLC7A7/SLC43A2/SLC46A1/SLC16A13/SLC38A7/SLC38A5/SLC35A5/SLC38A10/SLC15A4/SLC16A3/SLC17A5/SLC25A13/SLC26A1/SLC16A4/ABCC3/SLC1A4/SLC7A8/SLC19A1/SLC6A9/SLC26A2/SLC7A6/SLC19A2/SLC38A3/SLC38A9/SLC25A15/SLC1A1/SLC16A11/SLC6A11/MFSD2A/SLC25A29/SLC16A5/SLC16A8/SLC25A30/SLC25A22/SLC7A10/SLC38A8/SF…
GO:0016757	transferase activity, transferring glycosyl groups	280	0.558989	1.49023	0.00102775	0.00248452	0.000845738	8530	tags=53%, list=23%, signal=41%	NDST1/MGAT5/GXYLT2/GALNT10/MGAT3/B3GNT9/GLT8D2/B4GALNT3/A4GALT/GALNT2/PARP11/CHPF/CHSY1/B4GALT5/POFUT1/B3GNT7/XYLT1/PARP4/PYGB/GALNT18/B3GALNT2/UGGT1/GALNT1/EXTL3/B4GALNT4/POGLUT3/GBGT1/MGAT5B/ST6GAL2/ST3GAL4/ST3GAL2/DPY19L1/GALNT5/TMTC2/TNKS2/B4GALT1/ALG12/XYLT2/POMGNT2/POMT2/STT3B/PIGQ/POFUT2/LARGE1/CHSY3/CSGALNACT2/GYG2/COLGALT1/XXYLT1/MGAT4A/ST8SIA2/B3GNT3/POGLUT2/B4GALT4/GCNT1/TMTC1/GALNT14/…
GO:0015079	potassium ion transmembrane transporter activity	159	0.568573	1.49076	0.00105152	0.00248452	0.000845738	11033	tags=55%, list=29%, signal=39%	KCNQ1/SLC12A4/KCNE4/KCNC3/KCNJ12/AQP1/SLC12A8/SLC9A8/SLC9A1/GRIK5/ATP1A1/SLC24A3/KCNAB2/PKD2/SLC12A7/SLC9A9/SLC12A9/KCND1/KCNK3/ATP1A2/KCNIP1/SLC9A2/SLC12A6/KCNG1/KCNJ5/KCNS1/SLC9A3/SLC24A1/TMEM38A/ABCC9/KCNMA1/KCNK2/KCNK13/MTMR6/KCNK6/KCNS3/ATP1B2/SLC9A7/KCND3/KCNF1/KCNB1/KCNN3/KCNT1/GRIK4/KCNJ8/KCNE5/KCNQ4/ATP1A3/KCNAB3/KCNC4/KCNQ3/LRRC55/KCNH3/SNAP25/KCNA5/KCNT2/HCN4/KCNK12/KCNAB1/KCNIP3/KCNJ1…
GO:0022836	gated channel activity	343	0.561146	1.50611	0.00101215	0.00248452	0.000845738	9339	tags=43%, list=25%, signal=32%	TTYH3/PIEZO1/CLIC6/ITPR3/RASA3/TRPV4/CYBB/KCNQ1/ANXA6/ANO1/CACNG4/SHROOM2/CLCN7/CACNA1H/ITPR2/CLCN6/ANO6/KCNE4/TMEM63A/KCNC3/KCNJ12/AQP1/TTYH2/TPCN1/GRIK5/TMEM37/ANO8/ASIC1/SCNN1A/CLIC4/KCNAB2/JPH2/PKD2/KCND1/JPH4/ITPR1/KCNK3/CACNA1G/KCNIP1/CLCN4/TMEM150C/CLIC5/CACNB3/CACNA1C/CLCN3/ITGAV/KCNG1/ANO7/KCNJ5/ANO2/KCNS1/SCNN1G/TMEM63B/CLCN5/CACHD1/KCNMA1/TSPOAP1/KCNK2/KCNK13/P2RX7/MTMR6/CLCNKB/TMEM109…
GO:0015293	symporter activity	144	0.579258	1.5079	0.00105597	0.00248452	0.000845738	10780	tags=53%, list=29%, signal=38%	SLC2A10/SLC36A1/SLC16A2/SLC45A3/SLC12A4/SLC23A2/SLC12A8/SLC6A6/SLC24A3/SLC6A12/SLC4A11/SLC12A7/SLC12A9/SLC16A13/SLC45A4/SLC15A4/SLC16A3/SLC17A5/SLC16A4/SLC1A4/SLC12A6/SLC6A9/SLC45A1/SLC24A1/SLC11A2/SLC20A1/SLC22A3/SLC38A3/SLC2A12/SLC5A6/SLC15A3/SLC1A1/SLC16A11/SLC6A11/SLC4A4/MFSD2A/SLC16A5/SLC20A2/SLC16A8/SLC22A5/SLC25A22/SLC33A1/SLC10A4/SLC23A1/SLC16A14/SLC36A4/SLC13A3/SLC34A3/MFSD4B/SLC2A13/SLC…
GO:0061629	RNA polymerase II-specific DNA-binding transcription factor binding	277	0.57019	1.52016	0.00102669	0.00248452	0.000845738	6370	tags=50%, list=17%, signal=42%	NCOR2/CNOT1/EGR2/CREBBP/ARNT2/NR4A1/GATA4/RBL2/KLF4/TCF21/NCOA6/MED1/EP300/TP53BP1/BAZ2A/NRIP1/ARID1A/RXRA/TBX3/SRC/DLL1/CTNNB1/NCOA3/FOXL2/TACC1/SMAD3/GABARAPL1/HIPK2/NSD1/STAT5B/TAF6/SMARCA4/TRIM68/ASXL1/LEF1/NCOA2/TP53BP2/FOS/TBX1/CHD4/LDB1/TOB2/DCAF1/TGFB1I1/TRIP12/GSK3B/FOXP1/NCOA1/TAF1/TACC2/WIPI1/ARNT/HIF1AN/ETS2/LATS1/NCOR1/VDR/MGA/KDM3A/MED13/GRIP1/RARB/PADI2/STAT3/PPARD/CRY1/PPARA/MAPK1…
GO:0019903	protein phosphatase binding	140	0.587433	1.52291	0.0010661	0.00248452	0.000845738	8241	tags=61%, list=22%, signal=48%	CSF1R/SIRPA/KCNQ1/MET/PXN/EGFR/CTNNB1/DLG4/JAK1/TRAF3/DAB2IP/PIK3R1/SLC9A1/CDH5/CTTNBP2NL/CD22/PTPN1/PTPRT/ATP2B4/PPP6R1/MTMR4/MAP3K5/BCL2/ERBB2/PPP1R3C/JAK3/CDKN1B/STAT3/SMG7/MAPK14/SPHK1/ANKLE2/SMG5/FLT4/STAU1/ITGA1/STX17/FOXO1/ADCY8/EIF2AK3/STAT6/CDC27/STRN/PARD3/CADM4/CDH2/LILRB1/SH3RF2/AKT1/ANAPC5/BOD1L1/HMGCR/KAT2A/SMTNL1/PPP3CB/SHOC2/PPP1R9B/PPP6R2/KIFAP3/AKAP11/PPP6R3/LILRB2/IQGAP1/VCP/PP…
GO:0015291	secondary active transmembrane transporter activity	237	0.574087	1.52476	0.00103306	0.00248452	0.000845738	8822	tags=45%, list=24%, signal=35%	SLCO2B1/SLC2A10/SLC35E2B/SLC36A1/SLC41A1/SLC16A2/CLCN7/SLCO2A1/CLCN6/SLC45A3/SLC12A4/SLC23A2/SLC8B1/SLC12A8/SLC6A6/SLC9A8/SLC9A1/SLC35E2A/SLC4A3/SLC24A3/SLC6A12/SLC37A2/SLC35E1/SLC4A11/SLC12A7/SLC9A9/SLC12A9/SLC16A13/SLC45A4/CLCN4/SLC35C1/SLC15A4/SLC16A3/SLC17A5/SLC26A1/SLC9A2/SLC16A4/CLCN3/SLC1A4/SLC12A6/SLC19A1/SLC6A9/SLC45A1/SLC26A2/SLC9A3/SLC47A1/SLC7A6/CLCN5/SLC24A1/SLC11A2/ANKH/SLC20A1/SLC2…
GO:0030246	carbohydrate binding	271	0.572588	1.52805	0.00102354	0.00248452	0.000845738	7740	tags=44%, list=21%, signal=35%	P3H3/MRC2/VCAN/M6PR/IGF2R/CD93/GALNT10/ENG/COLEC12/CNTN1/NECTIN1/MAN2B1/LOXL2/SIGLEC1/ATRN/SLC2A3/P3H2/MRC1/NPTX2/MAN2B2/GALNT2/MAN2A2/P3H1/NOMO2/CD209/PAM/ENPP1/PKD1/CD302/PLOD1/CD248/DGCR2/MLEC/GALNT18/GAA/GALNT1/CD22/OS9/COLEC11/MAN2C1/GALNT5/HK2/SIGLEC11/ADGRL2/P4HA2/C4B/ENPP2/LAYN/OLR1/CD34/KLRG2/FBXO2/NOMO3/PFKL/CLEC5A/CRYBG3/PLA2R1/GANAB/CLEC10A/LGALS8/HK1/P4HA3/GALNT14/LMAN1/SIGLEC10/MGAT…
GO:0016758	transferase activity, transferring hexosyl groups	216	0.57849	1.53561	0.00103199	0.00248452	0.000845738	9214	tags=58%, list=25%, signal=44%	NDST1/MGAT5/GALNT10/MGAT3/B3GNT9/B4GALNT3/A4GALT/GALNT2/CHPF/CHSY1/B4GALT5/POFUT1/B3GNT7/XYLT1/PYGB/GALNT18/B3GALNT2/UGGT1/GALNT1/EXTL3/B4GALNT4/POGLUT3/GBGT1/MGAT5B/DPY19L1/GALNT5/TMTC2/B4GALT1/ALG12/XYLT2/POMGNT2/POMT2/STT3B/PIGQ/POFUT2/LARGE1/CHSY3/CSGALNACT2/GYG2/COLGALT1/MGAT4A/B3GNT3/POGLUT2/B4GALT4/GCNT1/TMTC1/GALNT14/EXT2/DPY19L3/MGAT2/CHPF2/HEXB/FUT11/RPN2/EOGT/B3GNT10/MGAT1/ALG1/STT3A/F…
GO:0046873	metal ion transmembrane transporter activity	439	0.569208	1.53777	0.00100301	0.00248452	0.000845738	10991	tags=55%, list=29%, signal=39%	ITPR3/RASA3/TRPV4/KCNQ1/ANXA6/SLC41A1/CACNG4/SHROOM2/SLC39A6/CACNA1H/ITPR2/SLC12A4/KCNE4/CNNM4/SLC23A2/KCNC3/PKD1/KCNJ12/AQP1/SLC8B1/SLC12A8/SLC6A6/SLC9A8/TPCN1/SLC9A1/GRIK5/ATP2A3/TMEM37/ATP1A1/ATP2B4/ORAI2/ASIC1/SLC24A3/SCNN1A/SLC31A1/SLC6A12/SLC30A1/KCNAB2/NIPA2/JPH2/PKD2/SLC4A11/SLC40A1/SLC12A7/SLC9A9/SLC12A9/SLC39A9/KCND1/SLC39A7/JPH4/SEC61A1/ITPR1/KCNK3/CACNA1G/ATP1A2/ATP7B/TRPV2/KCNIP1/SLC…
GO:0015085	calcium ion transmembrane transporter activity	139	0.59426	1.54117	0.0010661	0.00248452	0.000845738	9557	tags=48%, list=26%, signal=36%	ITPR3/RASA3/TRPV4/ANXA6/CACNG4/CACNA1H/ITPR2/PKD1/SLC8B1/TPCN1/ATP2A3/TMEM37/ATP2B4/ORAI2/SLC24A3/JPH2/PKD2/JPH4/SEC61A1/ITPR1/CACNA1G/TRPV2/ATP2A2/CACNB3/PANX1/CACNA1C/ITGAV/SLC24A1/PSEN1/CACHD1/TSPOAP1/RYR1/TPCN2/LETM1/PDE2A/ATP2B2/ATP2C1/TRPM7/CACNA2D2/STIM2/CACNB1/TRPC1/CACNA1D/ANXA2P2/JPH3/MCU/P2RX4/MCOLN3/TRPM2/MCOLN1/FAM155A/TRPM4/CUL5/TRPC6/CACNA2D4/CNR1/SLC8A1/GRIN2D/GRIN2A/ATP2B1/ATP2C2…
GO:0140375	immune receptor activity	125	0.598903	1.54264	0.00107875	0.00248452	0.000845738	8377	tags=52%, list=22%, signal=40%	ACKR3/CNTFR/CX3CR1/C3AR1/IL1R1/CMKLR1/IL4R/F3/C5AR1/CSF2RB/CD4/IL10RA/HLA-DQA2/CRLF1/IL6ST/CD44/IL27RA/OSMR/MR1/IL17RA/IL7R/CSF2RA/CCR1/IL13RA1/CSF3R/IFNLR1/IL20RA/GHR/GFRA1/IL22RA1/IL17RD/IL18R1/GPR75/LILRB1/IL2RB/FZD4/HLA-DQB2/EBI3/HLA-DOA/IL17RE/IL2RA/LILRB2/CCR7/CCR5/IFNAR2/EPOR/HLA-DQA1/IFNAR1/CXCR2/IL17RB/IL17RC/CR1/CCR2/IFNGR1/IL1RAP/ACKR4/KRT17/FCGR2B/MPL/GPR35/IL5RA/CXCR1/LEPR/IL1RL2/CD2…
GO:0003714	transcription corepressor activity	237	0.581423	1.54424	0.00103306	0.00248452	0.000845738	8454	tags=56%, list=23%, signal=43%	AEBP1/CCND1/NCOR2/HEYL/SKI/RERE/CREBBP/TFCP2L1/ARHGAP35/NR2F2/ATN1/TLE3/WNT4/MED1/NRIP1/SPEN/ZHX3/SUFU/TLE4/RBFOX2/BASP1/BCOR/KDM5B/HIPK2/NSD1/SMARCA4/MSC/NACC2/SIN3B/TLE2/ZEB1/ATF7IP/HDAC4/GON4L/DNMT3A/LDB1/TOB2/LHX1/AJUBA/ZFPM2/CITED2/CBFA2T2/ID3/TRIM22/MAP3K10/SF1/MNT/EZH1/YAP1/NCOR1/PBXIP1/AEBP2/PHF12/HOXC6/TBL1X/PPP1R13L/DDX54/WTIP/MXD1/JAZF1/RARA/SIN3A/HDAC7/SFMBT1/SFMBT2/NR1D1/JDP2/RCOR2/P…
GO:0003823	antigen binding	147	0.591867	1.54468	0.00105485	0.00248452	0.000845738	7478	tags=48%, list=20%, signal=39%	TGFB1/SPON2/SLC7A5/SIRPA/IGHV3-15/EP400/IGHV1-18/IGHV4-34/IGHV4-31/IGHV3-33/CD209/IGHV3-74/IGHV3-23/IGHV1-24/IGLV3-21/IGHV4-59/IGHV4-28/IGLV2-11/IGHV3-30/IGHV3-21/MAML1/IGKV3-20/IGHV3-73/IGHV5-51/IGHV2-70/IGHV3-11/IGHV1-3/IGHV3-53/ITGA4/IGLV2-14/IGHG2/IGLV1-44/IL7R/IGHV1-69D/IGHV6-1/IGHV1-58/IGHV4-61/IGLV2-23/IGHG4/IGKV3-15/SLC7A8/IGHV3-66/IGHV3-49/IGHV4-4/IGHV2-26/TSPAN4/IGHA2/IGKV1-5/IGHV3-20/I…
GO:0003713	transcription coactivator activity	318	0.576469	1.54553	0.00101317	0.00248452	0.000845738	6413	tags=47%, list=17%, signal=39%	BCL9L/NR2F1/PRRX1/USP22/KMT2D/RERE/CREBBP/GATA4/HCFC1/SMARCA2/PHF2/NCOA6/MED1/EP300/ZMIZ1/NRIP1/ARID1A/RXRA/NR5A1/TCF20/ARID1B/CTNNB1/NCOA3/THRA/MEF2A/NR2C2/LPIN2/KDM5A/ABL1/NUP98/HIPK2/MAGED1/SMARCA4/MRTFA/ASXL1/KMT2C/HELZ2/SMARCC2/NCOA2/LPIN3/MAML1/ATXN7L3/PPRC1/SERTAD2/ZEB1/BCL9/ZCCHC12/KAT6A/ARL2BP/MTF1/TGFB1I1/ZMIZ2/NFE2L3/ZFPM2/FOXC1/ARID5B/CITED2/SRCAP/PER2/NCOA1/TAF1/ACTN1/MRTFB/NIBAN2/MN…
GO:0140297	DNA-binding transcription factor binding	351	0.580095	1.55927	0.00100705	0.00248452	0.000845738	6370	tags=51%, list=17%, signal=42%	NCOR2/CNOT1/SKI/EGR2/ZNF703/CREBBP/ARNT2/NR4A1/GATA4/HCFC1/TLE3/RBL2/KLF4/WFS1/TCF21/NCOA6/MED1/EP300/TP53BP1/BAZ2A/NEK6/NRIP1/ARID1A/RXRA/TBX3/RUNX2/SRC/DLL1/CTNNB1/NCOA3/FOXL2/ZNF516/TACC1/TLE4/MEF2A/SMAD3/GABARAPL1/HIPK2/NSD1/STAT5B/TAF6/MEF2D/SMARCA4/CRTC3/TRIM68/ASXL1/LEF1/NCOA2/TLE2/TP53BP2/FOS/TBX1/HDAC4/CHD4/LDB1/TOB2/DCAF1/TGFB1I1/TRIP12/HDAC5/GSK3B/FOXP1/NCOA1/TCF12/TAF1/MAP3K10/TACC2/W…
GO:0019902	phosphatase binding	185	0.593107	1.56168	0.00104822	0.00248452	0.000845738	8382	tags=62%, list=22%, signal=48%	CSF1R/WNK1/SIRPA/KCNQ1/MET/PXN/EGFR/CRY2/NFATC2/CTNNB1/DLG4/SMAD3/JAK1/TRAF3/DAB2IP/PIK3R1/SLC9A1/CDH5/PPP1R18/CTTNBP2NL/CD22/PTPN1/PTPRT/SPRED1/ATP2B4/PPP6R1/MTMR4/MAP3K5/BCL2/ERBB2/PPP1R3C/JAK3/SIGLEC11/CSRNP2/CDKN1B/STAT3/SMG7/TRPC4AP/CRY1/PPARA/ELL/MAPK14/SPHK1/ANKLE2/MAPK1/MAST2/SMG5/FLT4/STAU1/ITGA1/STX17/FOXO1/SBF2/ADCY8/TSC2/SYTL2/SIGLEC10/EIF2AK3/STAT6/CDC27/STRN/PARD3/CADM4/CDH2/LILRB1/…
GO:0002020	protease binding	128	0.605268	1.56206	0.00107181	0.00248452	0.000845738	6011	tags=48%, list=16%, signal=40%	LRP1/FN1/COL1A1/COL3A1/COL1A2/TIMP3/TIMP2/SH3PXD2A/SERPINE1/VWF/COMP/ITGB1/PINK1/FAP/STIM1/ECM1/IL1R1/F3/ADAMTSL4/A2M/DPP4/PSAP/NFRKB/FURIN/OS9/POLG/BCL2/GSK3B/TNFAIP3/CLTC/KIT/PANX1/RFFL/MBP/CDK5R1/ITGAV/LDLR/PRNP/DVL3/PTEN/SERPINA1/CAST/SERPINB9/RYR1/BDKRB2/TWNK/FADD/ITGA3/SART3/ADAMTS4/CD28/AMFR/SYVN1/VCP/ANXA2P2/BIN1/MALT1/BAG6/PRKN/ITGB3/SERPINF2
GO:0060090	molecular adaptor activity	251	0.598829	1.59162	0.00103306	0.00248452	0.000845738	7910	tags=58%, list=21%, signal=46%	COL1A2/DLG5/COL11A1/IRS1/COL14A1/EPS8/DAB2/CNOT1/COL8A2/FSCN1/SH2B3/MAP1A/PKP2/HCFC1/SASH1/ARRDC4/HSPA8/SHANK3/AKAP13/NEFH/SUN2/AP2B1/AFAP1L2/FRMD4A/DAB2IP/KSR1/EIF4G1/STX2/PIK3R1/WWC3/MYH9/SLC9A1/VPS18/ADAP2/PCNT/BICD2/CARD10/SORBS2/HIP1R/SUN1/SARM1/AP2A2/TRIM22/ECPAS/AP2A1/ERCC2/MAPK8IP3/OBSL1/TEX261/DDB1/RPTOR/GRIP1/YKT6/FLRT3/SPAG9/NCK2/ITSN1/MAVS/SHC1/RBM14/SERINC1/SHANK2/WWC2/FSCN2/TIRAP/SM…
GO:0015081	sodium ion transmembrane transporter activity	150	0.609919	1.59257	0.00105374	0.00248452	0.000845738	11033	tags=54%, list=29%, signal=38%	SLC41A1/SHROOM2/CNNM4/SLC23A2/SLC8B1/SLC6A6/SLC9A8/TPCN1/SLC9A1/GRIK5/ATP1A1/ASIC1/SLC24A3/SCNN1A/SLC6A12/PKD2/SLC4A11/SLC9A9/ATP1A2/SLC9A2/SLC6A9/SLC9A3/SCNN1G/SLC24A1/SLC20A1/SLC22A3/ATP1B2/SCN3B/SLC9A7/SCNN1B/SLC5A6/SCN5A/SCN1B/SCN2B/SLC1A1/SCN4B/SLC6A11/GRIK4/SLC4A4/MFSD2A/ATP1A3/SLC20A2/SCN8A/TRPM2/SCN7A/SLC10A4/SLC23A1/HCN4/SLC13A3/SLC34A3/HCN3/ASIC2/SLC8A1/NALCN/SLC9B2/SLC6A13/SLC9A5/SLC28…
GO:0140030	modification-dependent protein binding	144	0.615756	1.60291	0.00105597	0.00248452	0.000845738	7863	tags=52%, list=21%, signal=41%	WDR81/PHF2/KDM4A/PRPF8/ZRANB1/TP53BP1/BAZ2A/KDM5A/PHF8/RNF169/SMARCA4/CHD8/ANKRD13A/MINDY1/BRD3/KMT2A/YEATS2/TAB2/ANKRD13B/TAF1/HDAC6/TNFAIP3/CARM1/UBQLN4/GLYR1/FAN1/UBQLN2/ZBTB1/PYGO1/LYN/SPIN1/KMT2E/IDE/CBX2/MSH6/UBQLN1/ING5/PSME4/PHF13/PTPN6/NCAPD3/BRD4/ZMYND8/CDYL2/ING4/RBBP5/KDM7A/TNIP1/VCP/DNAJB2/SUZ12/BRD2/DZIP3/TRIM24/UHRF1/BAG6/SPIN3/ZMYND11/LRWD1/L3MBTL1/ATAD2B/RAD23B/SPRTN/IKBKG/CBX5/O…
GO:0070851	growth factor receptor binding	134	0.619067	1.60369	0.00106952	0.00248452	0.000845738	7152	tags=46%, list=19%, signal=38%	PDGFRB/PDGFRA/ITGA5/EFEMP1/ECM1/PTPRJ/PDGFA/IL1R1/PDGFD/SRC/VAV2/DAB2IP/ADAM17/FYN/APP/IL6ST/TGFA/CDH5/PDGFB/AGR2/CBL/FLRT3/SOCS5/SHC1/TXLNA/ERN1/TLR5/PDGFC/FLRT2/IL10/FGF19/HIP1/FGF9/SNX1/LYN/TOLLIP/IL1B/TNK2/ATXN2/RNF41/FGF3/PTEN/FRS2/PGF/CADM4/FGF7/FGF1/ERAP1/NPTN/IRAK4/LINGO1/GREM1/ITGB3/SLC9A3R1/FLRT1/SNX4/IL6/FGF2/IL1RAP/GRB2/IL1RN/FER
GO:0008237	metallopeptidase activity	179	0.611744	1.60892	0.00104932	0.00248452	0.000845738	7891	tags=47%, list=21%, signal=37%	AEBP1/MMP14/MMP2/CPXM1/MMP11/ADAMTS2/ECEL1/ADAMTS7/ADAM12/ADAMTS12/VASH1/CPXM2/ADAMTS16/FAP/ADAMTS10/MMP24/ECE1/ADAMTS14/MME/MMP19/ADAM17/CPZ/CPD/MMP17/MMP23B/ADAMTS9/ADAM8/ADAM9/MMP13/ADAM19/BMP1/MMP9/AGBL5/TRABD2A/ADAMTS15/ADAM33/RNPEPL1/IDE/CPA3/LMLN/ADAM23/ADAM10/VASH2/TRABD2B/MMP28/ANPEP/CPM/ADAMTS4/CPE/ERAP1/ACE/SPG7/AGTPBP1/XPNPEP1/MMP15/CPQ/ERAP2/ERMP1/ENPEP/ADAM28/MBTPS2/ADAMTS17/CNDP2/A…
GO:0051427	hormone receptor binding	185	0.611405	1.60986	0.00104822	0.00248452	0.000845738	6620	tags=48%, list=18%, signal=40%	NCOR2/CNOT1/NR4A1/TCF21/NCOA6/MED1/EP300/BAZ2A/NRIP1/ARID1A/RXRA/SRC/CTNNB1/NCOA3/FOXL2/TACC1/SMAD3/JAK1/NSD1/STAT5B/SMARCA4/TRIM68/FYN/ASXL1/LEF1/NCOA2/TOB2/DCAF1/TGFB1I1/TRIP12/FOXP1/NCOA1/TAF1/TACC2/WIPI1/PTPN11/ETS2/LATS1/NCOR1/VDR/KDM3A/MED13/GRIP1/RARB/PADI2/STAT3/CRY1/MED24/THRAP3/DDX54/MMS19/KDM1A/RB1/RERG/MED12/ACTN4/TYK2/ARRB1/FKBP4/BCAS3/FABP4/STRN/GNAO1/ZBTB7A/HIF1A/NR4A3/JMJD1C/PRKCB…
GO:1901681	sulfur compound binding	249	0.605583	1.61032	0.00103306	0.00248452	0.000845738	6462	tags=45%, list=17%, signal=37%	COL5A1/LRP1/FN1/THBS2/SLIT3/FSTL1/FBN1/SFRP1/CHST15/SMOC2/LTBP2/CCN2/CCN4/COL11A1/CRISPLD2/COMP/BMP4/CCDC80/CCN1/POSTN/DPYSL3/THBS1/NRP2/CFH/ANXA6/GAL3ST4/ECM2/GPNMB/TNXB/PTPRF/COL5A3/NRP1/ENPP1/FGFR1/CHRD/NAV2/PCOLCE/AGRN/SLIT2/APP/PAFAH1B1/ANOS1/RTN4RL1/PTCH1/THBS4/LANCL1/FGFRL1/ZNF146/PTPRS/ACACB/PCSK6/NDNF/OGDH/PRELP/PTGES/LGR6/PTPRC/CD34/GSTM3/TMEM184A/SEMA5A/ADAMTS15/HLCS/ACOT11/BMT2/SERPIN…
GO:0008238	exopeptidase activity	113	0.63363	1.61106	0.0010977	0.00248452	0.000845738	7795	tags=48%, list=21%, signal=38%	AEBP1/MMP14/CPXM1/CPVL/VASH1/SCRN1/CPXM2/FAP/MME/DPP4/CPZ/CPD/CTSZ/MMP17/MINDY1/TPP1/BACE1/GGT7/BLMH/PGPEP1/AGBL5/GGT5/RNPEPL1/CTSA/DPP9/CPA3/SCPEP1/VASH2/ANPEP/CPM/CPE/ERAP1/ACE/AGTPBP1/PREPL/XPNPEP1/MMP15/CPQ/ERAP2/ENPEP/DPP7/TPP2/CNDP2/ZMPSTE24/LTA4H/PREP/SCRN3/NPEPPS/DPP8/FOLH1/CPA4/AGBL2/METAP1D/NPEPPSP1
GO:0005543	phospholipid binding	425	0.597829	1.61463	0.00100402	0.00248452	0.000845738	7083	tags=49%, list=19%, signal=40%	FZD7/SH3PXD2A/SH3PXD2B/PREX1/CYTH3/ITPR3/AXL/THBS1/KCNQ1/SPTBN1/ANXA6/ARHGAP35/ANKFY1/NISCH/OSBPL5/SNX19/GBF1/TULP3/ZCCHC14/SNX29/NR5A1/ITPR2/SCARB1/EPB41/PLA2G2A/MICALL1/F3/SPTBN2/PLEKHA5/DAB2IP/SNX33/MME/SYT7/ARAP1/APPL2/AGAP1/PLEK/TPCN1/PSAP/TLN1/SLC9A1/ZFYVE9/MYO1B/C2CD5/ZFYVE26/ADAP2/AMER1/PITPNM1/SMURF1/ARHGAP32/PLD2/PARD3B/HIP1R/UNC13B/PLA2G15/TECPR1/SYT13/SYT11/RAB35/JPH2/DOC2B/SNX21/ZFYV…
GO:0035257	nuclear hormone receptor binding	152	0.623244	1.62865	0.00105374	0.00248452	0.000845738	6620	tags=54%, list=18%, signal=45%	NCOR2/CNOT1/NR4A1/TCF21/NCOA6/MED1/EP300/BAZ2A/NRIP1/ARID1A/RXRA/SRC/CTNNB1/NCOA3/FOXL2/TACC1/SMAD3/NSD1/STAT5B/SMARCA4/TRIM68/ASXL1/LEF1/NCOA2/TOB2/DCAF1/TGFB1I1/TRIP12/FOXP1/NCOA1/TAF1/TACC2/WIPI1/ETS2/LATS1/NCOR1/VDR/KDM3A/MED13/GRIP1/RARB/PADI2/STAT3/CRY1/MED24/THRAP3/DDX54/MMS19/KDM1A/RB1/RERG/MED12/ACTN4/ARRB1/FKBP4/BCAS3/STRN/ZBTB7A/HIF1A/NR4A3/JMJD1C/PRKCB/RNF4/GAS2L1/PIAS1/ESR1/TCF7L2/ME…
GO:0017124	SH3 domain binding	130	0.632115	1.6344	0.00107181	0.00248452	0.000845738	5906	tags=56%, list=16%, signal=47%	EFS/DPYSL3/SIRPA/ADAM12/GJA1/DOCK1/ARHGAP31/SH3BP5/SHANK3/RAPGEF1/DRD4/ABL1/AFAP1L2/WIPF1/AFAP1/ZNF106/DAB2IP/SOCS7/ADAM17/CNTNAP1/SYNGAP1/TP53BP2/ILK/GRIK5/SYNJ2/ERRFI1/INPPL1/LANCL1/PLSCR4/BCAR1/HIP1R/ADAM9/WASF2/CBL/MICAL1/ENAH/ADAM19/INPP5D/ARHGAP27/ELMO2/DTX1/DOCK4/WIPF3/SHANK2/DNM1/EVL/SYNJ1/HCLS1/ARHGAP1/DNM2/LYN/DOCK3/REPS1/ARHGAP17/CASP9/QKI/WAS/SOS1/PTPN6/SH3BP1/ADAM10/CRK/ARHGAP6/SH3BG…
GO:0050839	cell adhesion molecule binding	497	0.609114	1.64729	0.00100402	0.00248452	0.000845738	6828	tags=56%, list=18%, signal=46%	COL5A1/IGF2/FN1/COL3A1/EMILIN1/MMP14/CDH11/LAMB1/FBN1/COL16A1/TIMP2/CCN2/CCN4/CXCL12/ERC1/VWF/TGFBI/COMP/SFRP2/ITGA5/LAMA5/PPL/FSCN1/CCN1/ICAM1/POSTN/CDH3/GCN1/THBS1/NECTIN1/NOTCH3/GOLGA3/TENM4/SPTBN1/JAM3/VCAM1/ITGB2/NLGN2/PKP2/ITGB1/SEMA7A/LTBP4/AHNAK/PXN/FBLN5/HCFC1/NISCH/ECM2/CNN2/MACF1/PPFIBP1/FAP/CEMIP2/EDIL3/HSPA8/PTPRJ/MPRIP/PARVA/GPNMB/TNXB/LIMA1/LASP1/CALD1/EGFR/PI4KA/PLEC/SRC/PTPRF/MIC…
GO:0001216	DNA-binding transcription activator activity	439	0.611183	1.65117	0.00100301	0.00248452	0.000845738	7934	tags=50%, list=21%, signal=40%	CREB3L1/NOTCH1/RUNX1/HEYL/GLIS2/GLI3/EGR1/EGR2/FOXJ2/NDN/FOSB/EBF4/ARNT2/NR4A1/SALL2/CREB3L2/GATA4/NFE2L1/MLXIP/HCFC1/KLF4/EPAS1/MAF/TCF21/MEIS3/EP300/TBX3/RUNX2/NFATC2/ELK3/RREB1/PRDM2/FOXL2/STAT2/MEF2A/KLF13/GLI2/PLAGL2/NR2C2/SMAD3/AKNA/PLAGL1/ETV1/FOXF2/STAT5B/KLF10/FOXJ3/GATA2/MEF2D/EHF/NFATC3/MAFB/HOXA5/STAG1/LEF1/AR/PRDM4/STAT5A/ELF1/NFAT5/FOS/TBX1/ETS1/FOXD1/ETV6/MTF1/MYCN/FOXC1/HOXA10/TCF…
GO:0001228	DNA-binding transcription activator activity, RNA polymerase II-specific	438	0.611869	1.65302	0.00100301	0.00248452	0.000845738	6843	tags=45%, list=18%, signal=38%	CREB3L1/NOTCH1/RUNX1/HEYL/GLIS2/GLI3/EGR1/EGR2/FOXJ2/NDN/FOSB/EBF4/ARNT2/NR4A1/SALL2/CREB3L2/GATA4/NFE2L1/MLXIP/HCFC1/KLF4/EPAS1/MAF/TCF21/MEIS3/EP300/TBX3/RUNX2/NFATC2/ELK3/RREB1/PRDM2/FOXL2/STAT2/MEF2A/KLF13/GLI2/PLAGL2/NR2C2/SMAD3/AKNA/PLAGL1/ETV1/FOXF2/STAT5B/KLF10/FOXJ3/GATA2/MEF2D/EHF/NFATC3/MAFB/HOXA5/STAG1/LEF1/AR/PRDM4/STAT5A/ELF1/NFAT5/FOS/TBX1/ETS1/FOXD1/ETV6/MTF1/MYCN/FOXC1/HOXA10/TCF…
GO:0016922	nuclear receptor binding	110	0.65475	1.65618	0.00110011	0.00248452	0.000845738	6620	tags=55%, list=18%, signal=45%	NCOR2/CNOT1/NR4A1/TCF21/NCOA6/MED1/EP300/BAZ2A/NRIP1/ARID1A/RXRA/SRC/CTNNB1/NCOA3/FOXL2/TACC1/SMAD3/NSD1/STAT5B/SMARCA4/TRIM68/LEF1/NCOA2/DCAF1/TGFB1I1/FOXP1/NCOA1/WIPI1/ETS2/LATS1/VDR/KDM3A/GRIP1/RARB/PADI2/STAT3/DDX54/MMS19/KDM1A/RB1/RERG/ARRB1/FKBP4/STRN/ZBTB7A/NR4A3/PRKCB/RNF4/PIAS1/ESR1/KAT5/PARP1/PPARG/TRIM24/BRCA1/PRMT2/SMARCE1/SLC30A9/PPID/NCOA4
GO:0003779	actin binding	431	0.614334	1.66006	0.00100301	0.00248452	0.000845738	7999	tags=56%, list=21%, signal=45%	ANTXR1/PALLD/FLNC/EPS8/FSCN1/GAS7/SYNPO/EPB41L2/TRPV4/TNS1/MYO18A/LMOD1/SPTBN1/MYO9B/MAP1A/ANXA6/MYO1D/VASH1/SVIL/ITGB1/DAAM2/ENC1/CNN2/SSH1/MACF1/MYH10/SHANK3/MPRIP/PARVA/SHROOM2/MYH11/LIMA1/LASP1/CALD1/MARCKS/FLII/EGFR/PLEC/EPB41/ABLIM1/SPTBN2/MYO1C/ABL1/WIPF1/FLNB/AFAP1/MICAL2/SORBS1/PDLIM3/KLHL5/CGN/MRTFA/DAG1/MTSS1/SHROOM4/FLNA/WASF3/TLN1/MYH9/MYO1B/PPP1R18/VPS18/AFDN/INPPL1/CORO2B/ADD1/FERM…
GO:0030674	protein-macromolecule adaptor activity	207	0.630216	1.66845	0.00103734	0.00248452	0.000845738	7910	tags=59%, list=21%, signal=47%	COL1A2/DLG5/COL11A1/IRS1/COL14A1/EPS8/DAB2/COL8A2/FSCN1/SH2B3/MAP1A/HCFC1/ARRDC4/HSPA8/SHANK3/AKAP13/NEFH/SUN2/AP2B1/AFAP1L2/FRMD4A/DAB2IP/KSR1/STX2/PIK3R1/MYH9/SLC9A1/VPS18/ADAP2/BICD2/CARD10/SORBS2/HIP1R/SUN1/SARM1/AP2A2/TRIM22/AP2A1/ERCC2/MAPK8IP3/OBSL1/TEX261/DDB1/RPTOR/GRIP1/YKT6/FLRT3/SPAG9/NCK2/MAVS/SHC1/RBM14/SERINC1/SHANK2/FSCN2/TIRAP/BET1L/GOSR1/BICD1/MMS19/LDLRAP1/FLRT2/HIP1/CUX1/STX17…
GO:0004674	protein serine/threonine kinase activity	436	0.618536	1.6707	0.00100301	0.00248452	0.000845738	8028	tags=60%, list=21%, signal=48%	WNK1/NUAK1/DAPK1/TGFBR2/FAM20C/WNK2/MTOR/CDK6/CDC42BPB/RPS6KA2/ULK1/HIPK1/LMTK2/LTBP1/LTBP4/MINK1/PINK1/AKAP13/EGFR/NEK6/LATS2/PSKH1/SIK2/CDK14/STK40/PLK2/MAP4K4/MAST3/HIPK2/STK10/STK35/SBK1/CAMKK2/CAMK1D/AKT2/NEK9/CSNK1A1/MAP3K3/SPEG/ILK/RIPK4/SIK3/STK38/TRIO/CDC42BPG/DCAF1/CDK12/PIM1/ACVRL1/MAPKAPK2/MAP3K5/AKT3/CSNK1G1/STK32B/GSK3B/LIMK1/TAF1/CCNK/ERCC2/TAOK1/MAP3K10/MAP3K4/PDPK1/MAPK7/ACVR1B/P…
GO:0008201	heparin binding	169	0.638113	1.67483	0.00105152	0.00248452	0.000845738	4330	tags=40%, list=12%, signal=36%	COL5A1/FN1/THBS2/SLIT3/FSTL1/FBN1/SFRP1/SMOC2/LTBP2/CCN2/CCN4/COL11A1/CRISPLD2/COMP/BMP4/CCDC80/CCN1/POSTN/THBS1/NRP2/CFH/ECM2/GPNMB/TNXB/PTPRF/COL5A3/NRP1/FGFR1/CHRD/NAV2/PCOLCE/SLIT2/APP/PAFAH1B1/ANOS1/RTN4RL1/PTCH1/THBS4/FGFRL1/ZNF146/PTPRS/PCSK6/NDNF/PRELP/LGR6/PTPRC/TMEM184A/ADAMTS15/SERPINE2/LPL/CCN5/FGF9/RSPO4/APLP2/ADA2/PCOLCE2/NELL2/VTN/ADGRG1/PGF/AOC1/THBS3/CEL/LAMC2/CXCL6/FGF7/FGF1/SELP
GO:0005085	guanyl-nucleotide exchange factor activity	214	0.633414	1.68056	0.00102987	0.00248452	0.000845738	6175	tags=57%, list=17%, signal=48%	EPS8/ABR/PREX1/IQSEC1/CYTH3/SMCR8/MADD/DOCK1/PLEKHG2/DENND2A/RIN2/ARHGEF17/PLEKHG6/DOCK11/SH3BP5/ARHGEF10L/IQSEC3/GBF1/PLEKHG1/AKAP13/ARHGEF40/RAPGEF1/RGL1/SBF1/VAV2/DOCK6/DNMBP/ARHGEF6/ARHGEF11/FGD6/ARFGEF2/ARHGEF25/CYTH4/FGD1/PLEKHG5/TRIO/DENND2B/RGP1/PLEKHG4B/HERC1/RAB3GAP1/ARHGEF19/FLCN/ARHGEF12/PLEKHG3/RASGRF2/HERC2/DENND5A/DOCK8/RIN3/BCR/FGD5/ARHGEF1/DOCK4/PSD3/FARP1/DENND4B/DOCK5/RCC2/PLCE…
GO:0005516	calmodulin binding	200	0.636267	1.68553	0.00103413	0.00248452	0.000845738	7855	tags=55%, list=21%, signal=43%	AEBP1/DAPK1/TRPV4/KCNQ1/SPTBN1/MYO9B/UBR4/MYO1D/CNN2/ADCY3/WFS1/MYH10/MYH11/CALD1/MARCKS/EGFR/RGS4/EPB41/MYO1C/SYT7/NGFR/CAMKK2/CAMK1D/CAMSAP1/MYH9/SLC9A1/MYO1B/RGS16/PCNT/ATP2B4/ADD1/MAPKAPK2/CNN1/UNC13B/MYO5B/MYH14/MAP6/RASGRF2/PCYT1A/GEM/MYO1F/TJP1/RGS2/SPHK1/MYO5A/IQGAP2/ADD2/MYO1E/ITPKB/INVS/SYT1/CACNA1C/CASK/MBP/MYLK/ADD3/PLCB1/PHKA2/ADCY8/MYO10/CDK5RAP2/FAS/STRN/ITPKC/PHKB/RYR1/SPTAN1/ADCY…
GO:0051015	actin filament binding	198	0.641078	1.69667	0.00103842	0.00248452	0.000845738	7981	tags=58%, list=21%, signal=46%	ANTXR1/FSCN1/GAS7/TRPV4/MYO18A/ANXA6/MYO1D/SVIL/MACF1/MYH10/SHROOM2/MYH11/LIMA1/LASP1/MARCKS/FLII/EGFR/ABLIM1/MYO1C/ABL1/WIPF1/SHROOM4/FLNA/TLN1/MYH9/MYO1B/AFDN/CORO2B/ADD1/FERMT1/PKNOX2/AJUBA/HIP1R/MYO5B/MYH14/ACTN1/MICAL1/OBSL1/UTRN/SYNE2/PLS3/TLN2/MICALL2/MYO5A/RCSD1/IQGAP2/ADD2/LCP1/CORO1C/MYO1E/WIPF3/PANX1/FSCN2/TMEM201/ACTN4/ADD3/CDK5R1/HIP1/EEF2/HCLS1/WIPF2/SHROOM3/MYO10/SYNE1/CLMN/NEBL/WA…
GO:0001217	DNA-binding transcription repressor activity	242	0.639642	1.69827	0.00103306	0.00248452	0.000845738	7642	tags=53%, list=20%, signal=42%	AEBP1/CREB3L1/SNAI2/HEYL/NR2F1/PRRX1/ZBTB4/HIC1/FOXK1/ARHGAP35/ZNF219/FOXQ1/MAFK/TCF21/TBX3/NFATC2/ELK3/SP2/SALL1/NFATC3/MSC/SATB1/IRF8/ZBTB5/ZEB1/ZFHX3/ETV6/ARX/NFE2L3/ARID5B/HIVEP1/ZEB2/MNT/NKX3-2/ETS2/DACH1/AEBP2/HMGA2/NR1D2/JARID2/PPARD/TCF3/PRDM1/PPARA/BTG2/ZNF140/ETV3/HEY1/FOXM1/HIC2/MSX2/MXD1/ZNF668/MLXIPL/SREBF2/FOXO1/BACH1/ZFP90/BCL6B/KLF8/NFATC4/NR1D1/JDP2/SNAI1/ZBTB2/ASCL2/MITF/RCOR1/F…
GO:0001227	DNA-binding transcription repressor activity, RNA polymerase II-specific	242	0.639642	1.69827	0.00103306	0.00248452	0.000845738	7642	tags=53%, list=20%, signal=42%	AEBP1/CREB3L1/SNAI2/HEYL/NR2F1/PRRX1/ZBTB4/HIC1/FOXK1/ARHGAP35/ZNF219/FOXQ1/MAFK/TCF21/TBX3/NFATC2/ELK3/SP2/SALL1/NFATC3/MSC/SATB1/IRF8/ZBTB5/ZEB1/ZFHX3/ETV6/ARX/NFE2L3/ARID5B/HIVEP1/ZEB2/MNT/NKX3-2/ETS2/DACH1/AEBP2/HMGA2/NR1D2/JARID2/PPARD/TCF3/PRDM1/PPARA/BTG2/ZNF140/ETV3/HEY1/FOXM1/HIC2/MSX2/MXD1/ZNF668/MLXIPL/SREBF2/FOXO1/BACH1/ZFP90/BCL6B/KLF8/NFATC4/NR1D1/JDP2/SNAI1/ZBTB2/ASCL2/MITF/RCOR1/F…
GO:0008194	UDP-glycosyltransferase activity	151	0.65087	1.69868	0.00105708	0.00248452	0.000845738	8820	tags=60%, list=24%, signal=46%	NDST1/MGAT5/GXYLT2/GALNT10/MGAT3/B3GNT9/B4GALNT3/A4GALT/GALNT2/CHPF/CHSY1/B4GALT5/B3GNT7/XYLT1/GALNT18/B3GALNT2/UGGT1/GALNT1/EXTL3/B4GALNT4/POGLUT3/GBGT1/MGAT5B/GALNT5/B4GALT1/XYLT2/POMGNT2/PIGQ/LARGE1/CHSY3/CSGALNACT2/GYG2/COLGALT1/XXYLT1/MGAT4A/B3GNT3/POGLUT2/B4GALT4/GCNT1/GALNT14/EXT2/MGAT2/CHPF2/HEXB/EOGT/B3GNT10/MGAT1/B3GNT2/B3GNT8/OGT/GALNT15/COLGALT2/GYS1/EXT1/LARGE2/WDFY3/CSGALNACT1/B3GAT…
GO:1901981	phosphatidylinositol phosphate binding	161	0.652733	1.71057	0.00105263	0.00248452	0.000845738	7083	tags=55%, list=19%, signal=45%	FZD7/SH3PXD2A/SH3PXD2B/CYTH3/KCNQ1/ANKFY1/OSBPL5/SNX19/GBF1/TULP3/PLEKHA5/DAB2IP/SYT7/ARAP1/PLEK/TPCN1/SLC9A1/MYO1B/ZFYVE26/ADAP2/AMER1/ARHGAP32/HIP1R/TECPR1/RAB35/JPH2/SNX21/ZFYVE1/WIPI1/GRAMD2A/PLEKHB2/OSBP/WIPI2/ATP13A2/IQGAP2/ASAP1/PICALM/ARAP3/TIRAP/MTSS2/SYT1/LDLRAP1/HIP1/GSDME/RUBCNL/PLCB1/OSBPL8/OSBPL2/MYO10/SYTL2/KRIT1/PLEKHA1/PARD3/KIF16B/OBSCN/OGT/AKT1/NCF4/ARHGAP9/SNX13/PLEKHA8/FCHSD2…
GO:0017016	Ras GTPase binding	428	0.638473	1.72467	0.00100402	0.00248452	0.000845738	8341	tags=64%, list=22%, signal=50%	EPS8/ERC1/ABR/PREX1/TBC1D2B/SMCR8/CDC42BPB/TBC1D14/RAB11FIP5/MYO9B/MADD/LLGL1/ULK1/DOCK1/DAAM2/ANKFY1/RHOBTB3/PLEKHG2/DENND2A/RIN2/ARHGEF17/RAB11FIP1/PLEKHG6/DOCK11/SH3BP5/ARHGEF10L/PLEKHG1/AKAP13/ARHGEF40/RIMS4/TBC1D16/SH3BP4/RAPGEF1/TNPO2/RGL1/RUSC2/MICALL1/RASSF5/SBF1/MYO1C/VAV2/DNMBP/CLEC16A/RAB11FIP3/ARHGEF6/ARHGEF11/TBC1D13/TBC1D20/NGFR/FGD6/TNFAIP1/FLNA/TMEM127/ARHGEF25/SGSM2/AFDN/FGD1/PLE…
GO:0019955	cytokine binding	128	0.668377	1.72493	0.00107181	0.00248452	0.000845738	7170	tags=55%, list=19%, signal=45%	PXDN/PDPN/CSF1R/COMP/TGFBR2/ENG/THBS1/NRP2/TNFRSF1B/TGFB3/ACKR3/CNTFR/ITGB1/CX3CR1/LTBP1/LTBP4/IL1R1/NRP1/CHRD/CD4/LRRC32/IL10RA/A2M/CRLF1/LTBP3/IL6ST/VASN/NRROS/ACVRL1/TNFRSF1A/IL27RA/OSMR/ITGA4/ZFP36/CSF2RA/BMPR2/KIT/CCR1/IL13RA1/CSF3R/ITGAV/IL20RA/CD36/GHR/IL22RA1/TGFBR1/TWSG1/NBL1/WFIKKN2/IL18R1/IL2RB/ACKR1/FZD4/EBI3/IL2RA/CCR7/CCR5/KLHL20/TNFRSF11A/GREM1/GREM2/ITGB3/IFNAR1/CXCR2/ACVR1/NOG/CC…
GO:0017048	Rho GTPase binding	177	0.659768	1.73594	0.00104822	0.00248452	0.000845738	7607	tags=66%, list=20%, signal=52%	EPS8/ABR/PREX1/CDC42BPB/MYO9B/DOCK1/DAAM2/PLEKHG2/ARHGEF17/PLEKHG6/DOCK11/ARHGEF10L/PLEKHG1/AKAP13/ARHGEF40/VAV2/DNMBP/ARHGEF6/ARHGEF11/FGD6/TNFAIP1/FLNA/ARHGEF25/FGD1/PLEKHG5/TRIO/CDC42EP3/OCRL/PPP6R1/NCKAP1L/PLEKHG4B/ARHGEF19/NCF2/PARD6G/ARHGEF12/KIF3B/SRGAP2/PLEKHG3/RASGRF2/KCTD10/BCR/FGD5/ARHGEF1/DOCK4/FARP1/PAK4/RCC2/RGL2/ARHGEF15/ARHGAP44/IQGAP2/ITSN1/FARP2/CORO1C/ARHGEF4/ARHGEF18/MTSS2/DOC…
GO:0060589	nucleoside-triphosphatase regulator activity	343	0.647421	1.73767	0.00101215	0.00248452	0.000845738	7878	tags=61%, list=21%, signal=49%	ALDH1A1/ABR/PREX1/SIPA1L2/TBC1D2B/RASA3/SIRPA/TBC1D14/MYO9B/RALGAPA2/LLGL1/ARHGAP35/DOCK1/ASAP2/ARHGAP31/SIPA1L3/WNT11/SYDE1/ASAP3/RIN2/PLEKHG6/ARHGEF10L/ARHGAP23/TBC1D16/RGS4/RALGAPB/SH3BP4/NRP1/SESN2/DAB2IP/RAP1GAP2/ARAP1/ARHGEF6/ARHGEF11/RASA1/TBC1D13/TBC1D20/AGAP1/SLIT2/SYNGAP1/GPSM1/SMAP2/ARHGAP18/ARHGAP30/RGS16/SGSM2/ADAP2/ARL2BP/ARHGAP32/ERRFI1/GIT2/DLC1/OCRL/NCKAP1L/TBC1D5/RASAL2/RAB3GAP1…
GO:0031267	small GTPase binding	441	0.643799	1.73863	0.00100402	0.00248452	0.000845738	8341	tags=65%, list=22%, signal=51%	EPS8/ERC1/ABR/PREX1/TBC1D2B/SMCR8/CDC42BPB/TBC1D14/RAB11FIP5/MYO9B/MADD/LLGL1/ULK1/DOCK1/DAAM2/ANKFY1/RHOBTB3/PLEKHG2/DENND2A/RIN2/ARHGEF17/RAB11FIP1/PLEKHG6/DOCK11/SH3BP5/ARHGEF10L/PLEKHG1/AKAP13/ARHGEF40/RIMS4/TBC1D16/SH3BP4/RAPGEF1/TNPO2/RGL1/PEX5/RUSC2/MICALL1/RASSF5/SBF1/MYO1C/VAV2/DNMBP/CLEC16A/RAB11FIP3/ARHGEF6/ARHGEF11/TBC1D13/TBC1D20/NGFR/FGD6/TNFAIP1/FLNA/TMEM127/SORL1/ARHGEF25/SGSM2/AF…
GO:0035091	phosphatidylinositol binding	244	0.657957	1.74668	0.0010352	0.00248452	0.000845738	8125	tags=61%, list=22%, signal=48%	FZD7/SH3PXD2A/SH3PXD2B/CYTH3/ITPR3/KCNQ1/ANKFY1/NISCH/OSBPL5/SNX19/GBF1/TULP3/ZCCHC14/SNX29/ITPR2/SCARB1/EPB41/PLEKHA5/DAB2IP/SNX33/SYT7/ARAP1/APPL2/PLEK/TPCN1/TLN1/SLC9A1/ZFYVE9/MYO1B/ZFYVE26/ADAP2/AMER1/PITPNM1/ARHGAP32/PLD2/PARD3B/HIP1R/TECPR1/RAB35/JPH2/SNX21/ZFYVE1/WIPI1/PITPNM2/NUMA1/PIK3C2B/ESYT2/GRAMD2A/ITPR1/PHF12/PLEKHB2/OSBP/WIPI2/TNFAIP8L3/ATP13A2/IQGAP2/ASAP1/PICALM/SNX30/ARAP3/MYO1E…
GO:0005539	glycosaminoglycan binding	229	0.658747	1.75071	0.00103199	0.00248452	0.000845738	4335	tags=41%, list=12%, signal=37%	COL5A1/SULF2/FN1/THBS2/SLIT3/FSTL1/FBN1/SFRP1/SMOC2/LTBP2/VCAN/CCN2/CCN4/BGN/DCN/COL11A1/CRISPLD2/COMP/BMP4/CCDC80/TGFBR2/CCN1/POSTN/DPYSL3/ENG/THBS1/NRP2/STAB1/CFH/ANXA6/SPOCK2/GNS/LTBP4/ECM2/LYVE1/CEMIP/GPNMB/TNXB/PTPRF/COL5A3/NRP1/SULF1/FGFR1/CHRD/NAV2/PCOLCE/AGRN/SLIT2/APP/PAFAH1B1/EPYC/ANOS1/RTN4RL1/PTCH1/THBS4/FGFRL1/CD44/ZNF146/PTPRS/TLR2/PCSK6/NDNF/PRELP/LGR6/LAYN/PTPRC/TMEM184A/SEMA5A/AD…
GO:0004713	protein tyrosine kinase activity	133	0.681972	1.76542	0.00107296	0.00248452	0.000845738	7753	tags=62%, list=21%, signal=49%	PDGFRB/PDGFRA/CSF1R/EPHB4/DDR2/IGF2R/EFEMP1/AXL/IGF1R/ROR2/NRP2/FGFR3/PKDCC/HIPK1/MET/LMTK2/EPHB2/EGFR/HCK/SRC/EFNB3/NRP1/ABL1/JAK1/FGFR1/HIPK2/FYN/TYRO3/CAMKK2/EPHA2/PEAK1/PDGFRL/FGFRL1/CRIM1/ERBB2/KDR/JAK3/FGR/KIT/FLT4/SRMS/INSR/TYK2/LYN/MAP2K4/TNK2/TEK/MAP2K5/DYRK1B/MERTK/SLA/EPHB3/PTK2B/ABL2/DYRK2/LTK/DSTYK/BTK/TESK2/MATK/DDR1/MAP2K3/FGFR2/EPHA3/FLT1/ALK/ERBB3/TIE1/EPHA4/NTRK2/EPHB6/HIPK3/EPH…
GO:0005088	Ras guanyl-nucleotide exchange factor activity	137	0.688234	1.78405	0.00106952	0.00248452	0.000845738	5768	tags=61%, list=15%, signal=51%	EPS8/ABR/PREX1/SMCR8/MADD/DOCK1/PLEKHG2/DENND2A/RIN2/ARHGEF17/PLEKHG6/DOCK11/SH3BP5/ARHGEF10L/PLEKHG1/AKAP13/ARHGEF40/RAPGEF1/RGL1/SBF1/VAV2/DNMBP/ARHGEF6/ARHGEF11/FGD6/ARHGEF25/FGD1/PLEKHG5/TRIO/DENND2B/RGP1/PLEKHG4B/RAB3GAP1/ARHGEF19/ARHGEF12/PLEKHG3/RASGRF2/DENND5A/RIN3/BCR/FGD5/ARHGEF1/FARP1/DENND4B/RGL2/ARHGEF15/ITSN1/FARP2/ARHGEF4/ARHGEF18/SH3BP5L/DOCK2/FGD3/RIC1/RAPGEF2/RASGRP4/SBF2/ARHGEF…
GO:0017137	Rab GTPase binding	174	0.68943	1.81305	0.00105042	0.00248452	0.000845738	6091	tags=55%, list=16%, signal=46%	ERC1/TBC1D2B/SMCR8/TBC1D14/RAB11FIP5/MADD/LLGL1/ULK1/ANKFY1/RHOBTB3/DENND2A/RIN2/RAB11FIP1/SH3BP5/RIMS4/TBC1D16/RUSC2/MICALL1/SBF1/CLEC16A/RAB11FIP3/TBC1D13/TBC1D20/NGFR/TMEM127/SGSM2/DENND2B/RGP1/TBC1D5/BICD2/UNC13B/MYO5B/RAB3GAP1/TBC1D9B/MICAL3/BICDL1/TBC1D4/MICAL1/AP1G1/DENND5A/RIN3/RAB29/RIMS3/DENND4B/MICALL2/ADPRH/SYTL3/MYO5A/PICALM/RBSN/TBC1D2/ANKRD27/SH3BP5L/BICD1/RIC1/TBC1D1/RABGAP1L/ARHG…
GO:0030695	GTPase regulator activity	303	0.683959	1.83024	0.00102041	0.00248452	0.000845738	7878	tags=64%, list=21%, signal=51%	ALDH1A1/ABR/PREX1/SIPA1L2/TBC1D2B/RASA3/SIRPA/TBC1D14/MYO9B/RALGAPA2/LLGL1/ARHGAP35/DOCK1/ASAP2/ARHGAP31/SIPA1L3/WNT11/SYDE1/ASAP3/RIN2/PLEKHG6/ARHGEF10L/ARHGAP23/TBC1D16/RGS4/RALGAPB/SH3BP4/NRP1/SESN2/DAB2IP/RAP1GAP2/ARAP1/ARHGEF6/ARHGEF11/RASA1/TBC1D13/TBC1D20/AGAP1/SLIT2/SYNGAP1/GPSM1/SMAP2/ARHGAP18/ARHGAP30/RGS16/SGSM2/ADAP2/ARL2BP/ARHGAP32/ERRFI1/GIT2/DLC1/OCRL/NCKAP1L/TBC1D5/RASAL2/RAB3GAP1…
GO:0005096	GTPase activator activity	272	0.695079	1.85619	0.0010225	0.00248452	0.000845738	7763	tags=66%, list=21%, signal=53%	ALDH1A1/ABR/PREX1/SIPA1L2/TBC1D2B/RASA3/TBC1D14/MYO9B/RALGAPA2/LLGL1/ARHGAP35/DOCK1/ASAP2/ARHGAP31/SIPA1L3/WNT11/SYDE1/ASAP3/RIN2/PLEKHG6/ARHGEF10L/ARHGAP23/TBC1D16/RGS4/RALGAPB/NRP1/DAB2IP/RAP1GAP2/ARAP1/ARHGEF6/ARHGEF11/RASA1/TBC1D13/TBC1D20/AGAP1/SYNGAP1/SMAP2/ARHGAP18/ARHGAP30/RGS16/SGSM2/ADAP2/ARHGAP32/ERRFI1/GIT2/DLC1/OCRL/NCKAP1L/TBC1D5/RASAL2/RAB3GAP1/ARHGEF19/ARHGAP21/TBC1D9B/FLCN/TBC1D4…
GO:0019838	growth factor binding	137	0.723126	1.8745	0.00106952	0.00248452	0.000845738	3718	tags=55%, list=10%, signal=49%	COL5A1/COL6A1/COL1A1/COL3A1/COL1A2/PXDN/PDGFRB/HTRA1/IGFBP4/PDGFRA/LTBP2/CCN2/CCN4/IGFBP5/NKD2/HTRA3/IGF2R/TGFBR2/SRPX2/CCN1/ENG/IGF1R/THBS1/NRP2/TGFB3/FGFR3/GPC1/COL2A1/LTBP1/LTBP4/DUSP1/PDGFA/COL4A1/IL1R1/EGFR/NRP1/GLG1/FGFR1/LRRC32/IL10RA/A2M/NGFR/LTBP3/IL6ST/FURIN/PDGFB/VASN/NRROS/RHBDF1/ACVRL1/FGFRL1/CRIM1/ERBB2/OSMR/ITGA6/KDR/PCSK6/ACVR1B/IGFBPL1/BMPR2/SHC1/IGFBP3/IGFBP6/FLT4/CSF3R/INSR/ITG…
GO:0005178	integrin binding	132	0.760005	1.9671	0.00107296	0.00248452	0.000845738	4480	tags=58%, list=12%, signal=51%	COL5A1/IGF2/FN1/COL3A1/EMILIN1/MMP14/LAMB1/FBN1/COL16A1/TIMP2/CCN2/CCN4/CXCL12/VWF/TGFBI/COMP/SFRP2/ITGA5/LAMA5/CCN1/ICAM1/THBS1/JAM3/VCAM1/ITGB2/ITGB1/SEMA7A/LTBP4/PXN/FBLN5/NISCH/ECM2/FAP/EDIL3/GPNMB/TNXB/EGFR/SRC/ITGB5/LAMB2/ADAM17/TLN1/MYH9/ILK/THBS4/NPNT/ICAM5/S1PR2/CX3CL1/ACTN1/ADAM9/KDR/UTRN/ITGBL1/FERMT3/LCP1/TSPAN8/DST/ACTN4/ITGAV/CCN5/ITGB8/SPP1/LGALS8/LYN/ITGA2/IL1B/CIB2/VTN/ITGB4/TSPA…
GO:0005201	extracellular matrix structural constituent	163	0.817547	2.14324	0.00105374	0.00248452	0.000845738	1729	tags=53%, list=5%, signal=51%	AEBP1/COL5A1/HSPG2/COL6A3/COL6A1/FN1/COL1A1/COL3A1/EMILIN1/COL1A2/COL6A2/PXDN/FBLN2/FMOD/LAMB1/THBS2/NID2/COL5A2/PODN/CILP/NID1/FBN1/MFAP4/OGN/SPARC/COL16A1/LTBP2/VCAN/BGN/COL8A1/DCN/COL11A1/FBLN1/COL14A1/VWF/COL10A1/TGFBI/COMP/LAMA5/COL8A2/SRPX2/EFEMP1/CCN1/POSTN/LUM/THBS1/MFAP5/ELN/COL15A1/MXRA5/COL2A1/LTBP1/LTBP4/FBLN5/COL4A2/COL9A3/ECM1/EDIL3/CTHRC1/FBN3/SRPX/COL4A1/LAMB3/TNXB/ASPN/COL12A1/CO…
GO:0022803	passive transmembrane transporter activity	474	0.471122	1.27458	0.00200401	0.00436624	0.00148628	8863	tags=38%, list=24%, signal=29%	TTYH3/PIEZO1/CLIC6/ITPR3/RASA3/TRPV4/CYBB/KCNQ1/GJA1/ANXA6/GJB2/ANO1/CACNG4/SHROOM2/CLCN7/CACNA1H/ITPR2/CLCN6/ANO6/KCNE4/TMEM63A/KCNC3/PKD1/KCNJ12/AQP1/TTYH2/TPCN1/GRIK5/TMEM37/ANO8/ORAI2/ASIC1/SLC24A3/SCNN1A/BCL2/CLIC4/LRRC8A/KCNAB2/JPH2/PKD2/GJC2/SLC4A11/KCND1/JPH4/SEC61A1/ITPR1/KCNK3/CACNA1G/GJC1/TRPV2/KCNIP1/CLCN4/TMEM150C/CLIC5/CACNB3/PANX1/CACNA1C/CLCN3/SLC1A4/ITGAV/KCNG1/ANO7/KCNJ5/ANO2/KC…
GO:0015267	channel activity	473	0.471198	1.27524	0.002002	0.00436624	0.00148628	8863	tags=38%, list=24%, signal=29%	TTYH3/PIEZO1/CLIC6/ITPR3/RASA3/TRPV4/CYBB/KCNQ1/GJA1/ANXA6/GJB2/ANO1/CACNG4/SHROOM2/CLCN7/CACNA1H/ITPR2/CLCN6/ANO6/KCNE4/TMEM63A/KCNC3/PKD1/KCNJ12/AQP1/TTYH2/TPCN1/GRIK5/TMEM37/ANO8/ORAI2/ASIC1/SLC24A3/SCNN1A/BCL2/CLIC4/LRRC8A/KCNAB2/JPH2/PKD2/GJC2/SLC4A11/KCND1/JPH4/SEC61A1/ITPR1/KCNK3/CACNA1G/GJC1/TRPV2/KCNIP1/CLCN4/TMEM150C/CLIC5/CACNB3/PANX1/CACNA1C/CLCN3/SLC1A4/ITGAV/KCNG1/ANO7/KCNJ5/ANO2/KC…
GO:0001664	G protein-coupled receptor binding	278	0.49003	1.3068	0.00205339	0.00436624	0.00148628	7137	tags=41%, list=19%, signal=33%	ADRA2A/SFRP1/FZD1/FZD7/CXCL12/CLIC6/GNA12/TUB/ROR2/LRP6/WNT6/BAMBI/WNT11/HSPA8/CTHRC1/CXCL14/TULP3/WNT4/S1PR1/FPR1/CNRIP1/DLG4/JAK1/AGT/CCL21/ARAP1/ARHGEF11/FYN/FLNA/PSAP/PTCH1/WNT9A/WNT7B/WLS/S1PR2/CX3CL1/WNT5B/ARHGEF12/MARCO/EDN3/WNT10A/PROK1/WNT5A/PTPN11/ARHGEF1/STAT3/ATP2A2/ITCH/RNF43/CXCL5/BICD1/GNA15/DNM1/RAPGEF2/USP20/WNT2B/TYK2/PTCH2/RSPO4/DNM2/PALM/ADA2/GNAZ/PRNP/ARRB1/ARRDC3/DVL3/ITGB4/…
GO:0004721	phosphoprotein phosphatase activity	182	0.523312	1.37865	0.00209644	0.00436624	0.00148628	8119	tags=51%, list=22%, signal=40%	PTPRU/DUSP16/PLPP3/CTDSP2/SSH1/DUSP1/TNS2/PTPRJ/PTPRF/PALD1/SBF1/PTPN23/PTPN21/PPM1H/PTPN1/PTPRT/MTMR4/PTPRM/PTPRK/PPP1R3B/PTPRS/DUSP7/PTPN11/PPP1R3C/PTPN13/CTDSPL/PTPN3/PPP4R1/PTPRG/PTPRC/PPM1F/EYA3/PTPN14/CTDP1/DUSP3/PTPRA/DUSP4/PTPRD/EYA4/PTPRE/DUSP8/PTEN/MTMR6/PTPRO/PPP2R5D/PHLPP1/PTPN9/PTPN6/EYA1/UBASH3B/CAMK2G/PTP4A1/PPM1M/PPTC7/CDC14B/TAB1/PDXP/PPP3CB/SHOC2/PHLPP2/MTMR2/PPM1D/PTPRN2/PPM1L/…
GO:0004386	helicase activity	163	0.542218	1.42145	0.00210748	0.00436624	0.00148628	7545	tags=45%, list=20%, signal=36%	RECQL/EP400/SMARCA2/SNRNP200/UPF1/CHD6/CHD3/NAV2/SMARCA4/CHD8/SLFN11/HELZ2/DHX37/DHX38/DHX8/CHD4/SRCAP/CHTF8/ERCC2/DHX57/BTAF1/SMARCA1/DHX16/INO80/FBH1/SKIV2L/DDX54/HELZ/DICER1/SETX/DDX39B/DHX9/RAD54L2/DDX23/ACTR8/DDX17/IGHMBP2/ERCC3/DHX30/DDX6/DDX51/DDX12P/DDX3X/CHD2/DDX42/DHX32/CHD7/TWNK/DDX52/EIF4A1/TDRD9/DHX58/DHX40/DDX19A/DHX29/ERCC6L2/DDX11/SMARCAL1/DHX33/SHPRH/ASCC3/DDX1/MTREX/HLTF/RECQL5/…
GO:0008234	cysteine-type peptidase activity	184	0.540639	1.42379	0.00209424	0.00436624	0.00148628	9946	tags=48%, list=27%, signal=35%	SFRP1/USP34/USP22/CTSK/ZRANB1/USP5/USP54/CTSZ/MINDY1/USP42/TNFAIP3/LGMN/BLMH/PGPEP1/USP24/USP30/USP19/USP20/CAPN15/JOSD1/USP32/CAPN2/CTSO/USP37/OTUB2/SENP1/CASP9/CAPN6/USP40/CAPN7/USP47/TINAGL1/USP3/OTUD3/USP12/BAP1/DESI2/USP36/OTUD5/USP44/ANKZF1/USP2/UFSP2/USP7/USP49/CYLD/USP43/CASP7/CAPN10/MALT1/USP31/USP4/STAMBPL1/CAPN5/PIGK/USP35/USP8/CAPN1/USP46/OTUD4/USP11/OTUD7B/USP13/USPL1/STAMBP/USP51/CA…
GO:0008528	G protein-coupled peptide receptor activity	145	0.555619	1.44811	0.00210748	0.00436624	0.00148628	9887	tags=41%, list=26%, signal=30%	SORCS2/ACKR3/APLNR/CX3CR1/FPR3/CMKLR1/FPR1/EDNRA/F2R/PTH1R/ADCYAP1R1/OPRL1/CCR1/RAMP1/TACR1/CALCRL/BDKRB2/GPR75/INPP5K/RAMP3/AGTR1/LTB4R2/OGFRL1/CCR7/CCR5/AVPR1A/AVPR2/F2RL3/LTB4R/CXCR2/MC1R/GPR143/GPR84/CCR2/VIPR2/ACKR4/LGR5/SSTR3/NPR3/MLNR/CRCP/F2RL2/GPR35/CXCR1/GIPR/MCHR1/GP1BA/GLP1R/AGTR2/CCR4/SCTR/CCKBR/CCRL2/NLRP6/OXTR/TSHR/OPRK1/FPR2/ACKR2
GO:0001653	peptide receptor activity	151	0.556345	1.45198	0.00211416	0.00436624	0.00148628	9887	tags=40%, list=26%, signal=30%	SORCS2/ACKR3/APLNR/CX3CR1/FPR3/CMKLR1/FPR1/EDNRA/F2R/PTH1R/ADCYAP1R1/OPRL1/NPR2/CCR1/RAMP1/TACR1/CRHR1/CALCRL/BDKRB2/GPR75/INPP5K/RAMP3/AGTR1/LTB4R2/OGFRL1/CCR7/CCR5/AVPR1A/AVPR2/F2RL3/LTB4R/CXCR2/MC1R/GPR143/GPR84/CCR2/VIPR2/ACKR4/LGR5/SSTR3/NPR3/MLNR/CRCP/F2RL2/GPR35/CXCR1/GIPR/MCHR1/GP1BA/GLP1R/AGTR2/CCR4/SCTR/CCKBR/CCRL2/NLRP6/OXTR/TSHR/OPRK1/FPR2/ACKR2
GO:0005319	lipid transporter activity	131	0.563178	1.45771	0.00214362	0.00436624	0.00148628	9304	tags=50%, list=25%, signal=38%	SLCO2B1/OSBPL5/SPNS2/SLCO2A1/ANO6/ABCC1/APOD/ABCA2/PITPNM1/SLC27A1/PLSCR4/PITPNM2/NPC1/ABCA3/OSBP/TNFAIP8L3/OSBPL7/ABCA1/SLC27A4/ABCC3/OSBPL10/GRAMD1A/ANO7/SCARB2/STRA6/OSBPL8/OSBPL2/PITPNA/ABCA8/OSBPL1A/FABP4/RBP4/TMEM30A/ABCG1/STARD7/PLEKHA8/GRAMD1B/OSBPL11/ABCA7/PITPNC1/GLTP/ANO9/OSBPL3/ABCA9/MFSD2A/TMEM30B/ATP8B1/PLTP/C2CD2L/GLTPD2/SLC10A4/OSBP2/ABCB1/ANO4/ABCA6/ABCA4/SLC51A/GM2A/ATP8A2/ABCG8…
GO:0005262	calcium channel activity	123	0.596482	1.53521	0.00215054	0.00436624	0.00148628	9557	tags=46%, list=26%, signal=35%	ITPR3/RASA3/TRPV4/ANXA6/CACNG4/CACNA1H/ITPR2/PKD1/TPCN1/TMEM37/ORAI2/SLC24A3/JPH2/PKD2/JPH4/SEC61A1/ITPR1/CACNA1G/TRPV2/CACNB3/PANX1/CACNA1C/ITGAV/SLC24A1/PSEN1/CACHD1/TSPOAP1/RYR1/TPCN2/PDE2A/TRPM7/CACNA2D2/STIM2/CACNB1/TRPC1/CACNA1D/ANXA2P2/JPH3/MCU/P2RX4/MCOLN3/TRPM2/MCOLN1/FAM155A/TRPM4/CUL5/TRPC6/CACNA2D4/CNR1/GRIN2D/GRIN2A/TRPV3/GAS6/ANXA2/TRPV6/CACNB2/ORAI1
GO:1902936	phosphatidylinositol bisphosphate binding	110	0.620401	1.56929	0.00220022	0.00441753	0.00150374	7455	tags=53%, list=20%, signal=42%	FZD7/SH3PXD2A/SH3PXD2B/KCNQ1/GBF1/TULP3/PLEKHA5/SYT7/PLEK/TPCN1/SLC9A1/MYO1B/ADAP2/AMER1/HIP1R/RAB35/JPH2/SNX21/ZFYVE1/WIPI1/GRAMD2A/WIPI2/ATP13A2/ASAP1/PICALM/ARAP3/TIRAP/MTSS2/SYT1/LDLRAP1/HIP1/GSDME/PLCB1/OSBPL2/SYTL2/KRIT1/PLEKHA1/PARD3/KIF16B/OBSCN/AKT1/FCHSD2/PLCD1/PLEKHA2/ANXA8/SESTD1/ANXA2P2/SNX20/FCHO2/MYO1G/MARK1/TWF1/CGAS/PLEKHA4/MAPT/SNX18/GAB2/ALOX15
GO:0004222	metalloendopeptidase activity	101	0.646625	1.63077	0.00221976	0.00441753	0.00150374	7891	tags=52%, list=21%, signal=42%	MMP14/MMP2/MMP11/ADAMTS2/ECEL1/ADAMTS7/ADAM12/ADAMTS12/ADAMTS16/FAP/ADAMTS10/MMP24/ECE1/ADAMTS14/MME/MMP19/ADAM17/MMP17/MMP23B/ADAMTS9/ADAM8/ADAM9/MMP13/ADAM19/BMP1/MMP9/TRABD2A/ADAMTS15/ADAM33/IDE/LMLN/ADAM23/ADAM10/TRABD2B/MMP28/ADAMTS4/SPG7/MMP15/ADAM28/MBTPS2/ADAMTS17/ADAMTS5/ZMPSTE24/ASTL/ADAM11/ADAMTS8/MMP25/AFG3L2/ADAMTS18/ADAM22/MIPEP/ADAMTS13/YME1L1
GO:0005126	cytokine receptor binding	284	0.486468	1.29953	0.00306749	0.00601065	0.00204604	7184	tags=36%, list=19%, signal=29%	PXDN/CXCL12/TGFB1/ITGA5/BMP4/TGFBR2/PLCG1/ENG/TGFB3/SH2B3/BAMBI/MADD/CNTFR/BMP6/ECM1/CXCL14/RASL11B/TGFBRAP1/SMAD3/JAK1/TRAF3/DAB2IP/CCL21/ADAM17/INHBB/CRLF1/PIK3R1/IL6ST/CDH5/INHBA/SPRED1/BMP8B/CX3CL1/SPRED2/BMP8A/LIF/FEM1B/STAT3/TNFSF8/TRAF5/SMAD7/SHC1/ITCH/CXCL5/TNFSF13/TLR5/NTF3/IL10/TYK2/TGFB2/TOLLIP/IL1B/RNF41/TGFBR1/LEFTY2/RIPK1/OSM/MYD88/FRS2/CCL3/TMBIM1/PGF/GDF11/CADM4/KITLG/IL34/CXCL6/F…
GO:0016746	transferase activity, transferring acyl groups	264	0.504818	1.34458	0.00308008	0.00601065	0.00204604	7931	tags=41%, list=21%, signal=32%	F13A1/LPCAT3/MCM3AP/USP22/CREBBP/TGM2/HCFC1/NATD1/EP300/ACLY/NCOA3/SPTLC1/KANSL1/ZDHHC7/KMT2C/FASN/AGPAT3/CERS4/ZDHHC8/KAT6A/ELOVL5/ZDHHC5/NAT8L/MBOAT1/PLA2G15/LPGAT1/GGT7/SRCAP/NCOA1/TAF1/HGSNAT/CERS6/KANSL3/YKT6/GPAT4/DLST/SPHK1/SPTLC2/ZDHHC18/AGPAT4/GGT5/KAT6B/EPC2/ZDHHC4/HHAT/GPAM/BRPF1/GTF3C4/LPCAT1/NAA40/TAF5L/ZDHHC14/CROT/ATE1/SOAT1/ZDHHC3/GLUL/MBOAT2/AGPAT1/OGT/PHF10/ELOVL2/KAT14/KAT2A/ZD…
GO:0019783	ubiquitin-like protein-specific protease activity	123	0.557425	1.43469	0.00430107	0.00826242	0.00281256	10244	tags=50%, list=27%, signal=37%	USP34/USP22/ZRANB1/USP5/USP54/MINDY1/USP42/TNFAIP3/USP24/USP30/USP19/USP20/JOSD1/USP32/USP37/OTUB2/SENP1/USP40/USP47/USP3/OTUD3/USP12/BAP1/DESI2/USP36/OTUD5/USP44/ANKZF1/USP2/UFSP2/USP7/USP49/CYLD/USP43/USP31/USP4/STAMBPL1/USP35/USP8/USP46/OTUD4/USP11/OTUD7B/USP13/USPL1/STAMBP/USP51/USP48/YOD1/SENP7/VCPIP1/USP27X/SENP6/OTULIN/SENP2/SENP5/OTUD1/USP25/USP28/USP33/MINDY2/USP15
GO:0036459	thiol-dependent ubiquitinyl hydrolase activity	114	0.564797	1.43613	0.00438597	0.00826242	0.00281256	7194	tags=39%, list=19%, signal=31%	USP34/USP22/ZRANB1/USP5/USP54/MINDY1/USP42/TNFAIP3/USP24/USP30/USP19/USP20/JOSD1/USP32/USP37/OTUB2/USP40/USP47/USP3/OTUD3/USP12/BAP1/DESI2/USP36/OTUD5/USP44/ANKZF1/USP2/USP7/USP49/CYLD/USP43/USP31/USP4/STAMBPL1/USP35/USP8/USP46/OTUD4/USP11/OTUD7B/USP13/STAMBP/USP51
GO:0101005	ubiquitinyl hydrolase activity	114	0.564797	1.43613	0.00438597	0.00826242	0.00281256	7194	tags=39%, list=19%, signal=31%	USP34/USP22/ZRANB1/USP5/USP54/MINDY1/USP42/TNFAIP3/USP24/USP30/USP19/USP20/JOSD1/USP32/USP37/OTUB2/USP40/USP47/USP3/OTUD3/USP12/BAP1/DESI2/USP36/OTUD5/USP44/ANKZF1/USP2/USP7/USP49/CYLD/USP43/USP31/USP4/STAMBPL1/USP35/USP8/USP46/OTUD4/USP11/OTUD7B/USP13/STAMBP/USP51
GO:0015294	solute:cation symporter activity	103	0.580063	1.4632	0.00443951	0.00826242	0.00281256	10908	tags=51%, list=29%, signal=37%	SLC2A10/SLC36A1/SLC45A3/SLC12A4/SLC23A2/SLC12A8/SLC6A6/SLC6A12/SLC12A7/SLC12A9/SLC45A4/SLC15A4/SLC17A5/SLC12A6/SLC6A9/SLC45A1/SLC11A2/SLC20A1/SLC22A3/SLC2A12/SLC5A6/SLC15A3/SLC1A1/SLC6A11/SLC4A4/MFSD2A/SLC20A2/SLC33A1/SLC10A4/SLC23A1/SLC13A3/SLC34A3/SLC2A13/SLC15A1/SLC2A6/SLC15A2/SLC6A13/SLC28A2/SLC6A1/SLC13A4/SLC4A8/SLC38A1/SLC4A7/SLC34A2/SLC18A2/SLC6A3/SLC5A5/SLC13A5/SLC25A3/SLC17A7/SLC6A4/SLC1…
GO:0000149	SNARE binding	109	0.583531	1.47582	0.00441014	0.00826242	0.00281256	8754	tags=53%, list=23%, signal=41%	SEC24C/DAPK1/NBAS/ABL1/RNF40/SYT7/STX2/VPS18/UNC13B/SYT13/SYT11/DOC2B/GOLGA2/SEC24D/PICALM/TXLNA/ANKRD27/ABCA1/SNPH/SYT1/STX17/STXBP5/NSF/STX12/STX3/VPS11/BAIAP3/BLOC1S6/SNAP23/HECTD3/VPS54/GOSR2/STX7/VAMP3/STX11/SYT8/UVRAG/CAPN10/SEC22B/SYPL2/VPS50/VPS52/TMED10/SNAP25/VTI1B/PRRT2/TSNARE1/TXLNB/VTI1A/STX1A/SNAP47/LRRK2/NAPB/STXBP4/EXOC3/STX6/SYT3/STXBP1
GO:0005216	ion channel activity	434	0.467568	1.26322	0.00501505	0.00924793	0.00314802	8863	tags=38%, list=24%, signal=30%	TTYH3/PIEZO1/CLIC6/ITPR3/RASA3/TRPV4/KCNQ1/ANXA6/ANO1/CACNG4/SHROOM2/CLCN7/CACNA1H/ITPR2/CLCN6/ANO6/KCNE4/TMEM63A/KCNC3/PKD1/KCNJ12/AQP1/TTYH2/TPCN1/GRIK5/TMEM37/ANO8/ORAI2/ASIC1/SLC24A3/SCNN1A/CLIC4/LRRC8A/KCNAB2/JPH2/PKD2/SLC4A11/KCND1/JPH4/SEC61A1/ITPR1/KCNK3/CACNA1G/GJC1/TRPV2/KCNIP1/CLCN4/TMEM150C/CLIC5/CACNB3/PANX1/CACNA1C/CLCN3/SLC1A4/ITGAV/KCNG1/ANO7/KCNJ5/ANO2/KCNS1/SCNN1G/TMEM63B/CLCN5/…
GO:0008083	growth factor activity	163	0.535005	1.40255	0.0052687	0.00962736	0.00327718	5358	tags=29%, list=14%, signal=25%	IGF2/OGN/CCN2/CXCL12/TGFB1/BMP4/EFEMP1/TGFB3/BMP6/PDGFA/PDGFD/AGT/INHBB/TGFA/INHBA/PDGFB/THBS4/BMP8B/PROK1/BMP8A/JAG1/LIF/MACC1/BMP1/JAG2/PDGFC/NTF3/IL10/FGF19/FGF9/TGFB2/ADA2/FGF3/LEFTY2/OSM/PGF/GDF11/KITLG/RABEP1/IL34/FGF7/FGF1/LEFTY1/CSF1/GRN/BMP2/BMP7
GO:0005267	potassium channel activity	123	0.549868	1.41523	0.00537634	0.00973554	0.00331401	11033	tags=53%, list=29%, signal=37%	KCNQ1/KCNE4/KCNC3/KCNJ12/AQP1/GRIK5/KCNAB2/PKD2/KCND1/KCNK3/KCNIP1/KCNG1/KCNJ5/KCNS1/TMEM38A/ABCC9/KCNMA1/KCNK2/KCNK13/MTMR6/KCNK6/KCNS3/KCND3/KCNF1/KCNB1/KCNN3/KCNT1/GRIK4/KCNJ8/KCNE5/KCNQ4/KCNAB3/KCNC4/KCNQ3/LRRC55/KCNH3/SNAP25/KCNA5/KCNT2/HCN4/KCNK12/KCNAB1/KCNIP3/KCNJ14/HCN3/KCNK5/KCNN1/KCNJ15/KCNA3/KCNG3/KCNMB1/KCNJ2/KCNK17/TMEM175/LRRC38/KCNH8/GRIK2/KCNN4/KCNK1/GRIK3/KCNJ11/KCNA1/KCNQ5/KCNJ…
GO:0015108	chloride transmembrane transporter activity	100	0.578387	1.45665	0.00556793	0.00999244	0.00340146	5541	tags=30%, list=15%, signal=26%	TTYH3/CLIC6/ANO1/CLCN7/CLCN6/SLC12A4/ANO6/TTYH2/SLC12A8/ANO8/CLIC4/SLC12A7/SLC12A9/CLCN4/CLIC5/PCYOX1/SLC26A1/CLCN3/SLC1A4/SLC12A6/SLC26A2/ANO7/ANO2/CLCN5/CLCNKB/SLC22A3/CLCC1/SLC1A1/TTYH1/ANO9
GO:0004197	cysteine-type endopeptidase activity	116	0.557217	1.42229	0.00652884	0.0116132	0.00395318	10436	tags=47%, list=28%, signal=34%	SFRP1/USP34/CTSK/USP5/CTSZ/USP42/LGMN/BLMH/USP24/USP30/USP20/CAPN15/CAPN2/CTSO/USP37/CASP9/CAPN6/USP40/CAPN7/USP47/USP12/USP36/USP2/USP7/USP49/CASP7/CAPN10/MALT1/CAPN5/USP35/USP8/CAPN1/USP46/USP11/USP13/CAPN13/ATG4A/ATG4B/USP48/CASP2/CFLAR/CASP10/SENP7/SENP6/CTSH/SENP2/USP25/USP28/CAPN8/USP33/CAPN12/USP15/PDIA3/USP9X
GO:0004725	protein tyrosine phosphatase activity	100	0.564278	1.42112	0.00668151	0.0116781	0.00397527	8119	tags=55%, list=22%, signal=43%	PTPRU/DUSP16/SSH1/DUSP1/PTPRJ/PTPRF/PALD1/PTPN23/PTPN21/PTPN1/PTPRT/MTMR4/PTPRM/PTPRK/PTPRS/DUSP7/PTPN11/PTPN13/PTPN3/PTPRG/PTPRC/EYA3/PTPN14/DUSP3/PTPRA/DUSP4/PTPRD/EYA4/PTPRE/DUSP8/PTEN/MTMR6/PTPRO/PTPN9/PTPN6/EYA1/UBASH3B/PTP4A1/CDC14B/MTMR2/PTPRN2/CDC14A/PTPDC1/SSH2/PTPRB/MTMR1/CDC25B/PTPN12/PTPN4/PTPN5/PTPN18/DUSP19/DUSP5/PTPN7/MTMR3
GO:0005200	structural constituent of cytoskeleton	101	0.573512	1.44638	0.00665927	0.0116781	0.00397527	9080	tags=52%, list=24%, signal=40%	PPL/DES/TUBB2B/SPTBN1/TUBA1A/NEFH/PLEC/EPB41/SPTBN2/AGRN/INA/TLN1/TUBB2A/ADD1/SORBS2/CROCC/SORBS3/TUBB6/EPB41L3/VIM/TLN2/ADD2/BICD1/TUBG2/ADD3/HIP1/DSP/TPM1/TUBA3D/SPTAN1/ACTR2/MSN/ERBIN/DMD/KRT6B/SPTB/ANK3/EPB41L4B/SYNM/KRT17/TUBA1B/GFAP/VILL/TUBGCP4/SPTBN4/TUBGCP3/PLS1/CD2AP/BFSP1/ANK1/TUBA3E/TUBE1/TUBD1
GO:0016705	oxidoreductase activity, acting on paired donors, with incorporation or reduction of molecular oxygen	159	0.527835	1.38395	0.00736067	0.0127543	0.0043416	8069	tags=38%, list=22%, signal=30%	PTGIS/P3H3/HMOX1/TET3/P3H2/KDM4A/P3H1/CYP2S1/CYP27A1/PAM/PHF8/MICAL2/PLOD1/CYP2W1/ASPH/MOXD1/KDM4B/FADS2/FMO1/MICAL3/KDM2A/CYP26B1/MICAL1/HIF1AN/CH25H/KDM2B/FTO/P4HA2/FAXDC2/CYP7B1/P4HA3/TBXAS1/CYP1B1/SCD5/FADS1/SCD/PTGS2/FMO2/KDM1B/FMO4/KDM7A/P4HB/ALKBH8/EGLN1/TET2/TET1/ALKBH5/CYP26A1/NOS1/TYRP1/P4HA1/CYP39A1/CYP24A1/CYP11A1/PLOD2/PLOD3/OGFOD2/POR/CYP2U1/CYP17A1/CYP51A1
GO:0004843	thiol-dependent ubiquitin-specific protease activity	106	0.561716	1.41786	0.00776914	0.0132339	0.00450486	7194	tags=39%, list=19%, signal=31%	USP34/USP22/ZRANB1/USP5/MINDY1/USP42/TNFAIP3/USP24/USP30/USP19/USP20/JOSD1/USP32/USP37/OTUB2/USP40/USP47/USP3/OTUD3/USP12/BAP1/USP36/OTUD5/USP44/ANKZF1/USP2/USP7/USP49/CYLD/USP31/USP4/STAMBPL1/USP35/USP8/USP46/OTUD4/USP11/OTUD7B/USP13/STAMBP/USP51
GO:0042562	hormone binding	102	0.572589	1.44479	0.00776914	0.0132339	0.00450486	9428	tags=48%, list=25%, signal=36%	ALDH1A1/ABHD2/IGF1R/EGFR/THRA/ECE1/ADIPOR2/PIK3R1/AR/PTH1R/INHBA/ATP1A1/SLC40A1/ADCYAP1R1/VDR/NPR2/ATP1A2/ALDH1A3/SHC1/RAMP1/INSR/GHR/AMHR2/IDE/GPER1/CRHR1/CALCRL/CHRM3/CHRNB1/NR3C1/AVPR1A/ATP1A3/CDH13/ACVR1/CHRNA1/C2CD2L/VIPR2/NPR3/MLNR/GIPR/LEPR/ACHE/MCHR1/GLP1R/PRLR/SCTR/CCKBR/CTSH/ADIPOR1
GO:0015103	inorganic anion transmembrane transporter activity	142	0.52777	1.3715	0.00849257	0.0143446	0.00488294	9298	tags=42%, list=25%, signal=32%	TTYH3/CLIC6/ANO1/CLCN7/CLCN6/SLC12A4/ANO6/TTYH2/SLC12A8/SLC4A3/ANO8/SLC37A2/CLIC4/LRRC8A/SLC4A11/SLC12A7/SLC12A9/CLCN4/CLIC5/PCYOX1/SLC26A1/CLCN3/SLC1A4/SLC12A6/SLC26A2/ANO7/ANO2/CLCN5/ANKH/CLCNKB/SLC22A3/SLC4A2/CLCC1/LRRC8C/PIDD1/SLC1A1/TTYH1/ANO9/LRRC8B/SLC4A4/AQP6/SLC25A30/ADAMTS8/PACC1/SLC26A11/CLCNKA/ANO4/SLC26A10/ANO10/SLC37A1/CLIC2/XPR1/SLC26A6/GABRB2/GABRR1/GABRA3/LRRC18/SLC13A4/GABRB3/SL…
GO:0016298	lipase activity	127	0.537615	1.38642	0.00859291	0.0143931	0.00489947	7600	tags=46%, list=20%, signal=37%	ABHD2/PLCG1/PLBD2/HMOX1/SMPD1/PLA2G2A/EDNRA/PLBD1/PLD2/LIPA/SMPD4/PLA2G15/MGLL/PLA1A/CES1/GDPD5/PNPLA6/ENPP2/PLCE1/PLCL2/PGAP6/CCR1/PITPNM3/PLD1/LPL/PLCB1/SMPD3/PLCB2/LIPE/PLCG2/ABHD6/PLCB4/BDKRB2/CEL/PLD3/SEC23IP/NOTUM/PLCD3/PLA2G7/PLD4/PLCD1/DDHD2/GDE1/PLCH2/CHRM3/CCR5/NCEH1/PNPLA3/PLA2G1B/PLCH1/PLA2G5/PLCB3/ABHD3/PNPLA2/GPLD1/PLCL1/PLAAT5/DDHD1/NAPEPLD
GO:0016651	oxidoreductase activity, acting on NAD(P)H	100	-0.712104	-2.24612	0.00961539	0.0159727	0.00543715	2606	tags=45%, list=7%, signal=42%	DHRS4/CBR1/GSR/NDUFA5/NOX4/NDUFV1/DHDH/NDUFV3/NDUFA4/NDUFS4/NDUFS7/AIFM1/NQO1/NDUFAF2/TXNDC17/NDUFS3/NDUFA12/NDUFV2/NDUFB5/NDUFS5/NDUFAB1/NDUFB10/NDUFA6/NDUFB6/NDUFA8/NDUFB3/NDUFB8/NDUFB2/TXN/GMPR/CYBA/DCXR/NDUFS8/NDUFB4/NDUFB7/NDUFA7/NDUFB1/NDUFA2/NDUFB9/NDUFS6/NDUFC2/NDUFA3/NDUFA13/NDUFC1/NDUFA1
GO:0099094	ligand-gated cation channel activity	105	0.554502	1.40032	0.00997783	0.0163233	0.00555651	11033	tags=50%, list=29%, signal=36%	ITPR3/RASA3/SHROOM2/ITPR2/KCNJ12/AQP1/TPCN1/GRIK5/ASIC1/SCNN1A/JPH2/PKD2/JPH4/ITPR1/KCNJ5/SCNN1G/P2RX7/KCNK6/RYR1/PTK2B/TPCN2/SCNN1B/CHRNB1/GRIK4/KCNJ8/P2RX2/JPH3/P2RX4/MCOLN3/CHRNA1/TRPM2/MCOLN1/CNGA4/HCN4/KCNJ14/ASIC2/GRIN2D/GRIN2A/KCNJ15/P2RX1/KCNJ2/CHRNA6/GRIK2/KCNK1/GRIK3/CHRNB4/KCNJ11/GRIA3/CHRNG/GRIN2C/KCNJ10/JPH1/HCN2
GO:0004620	phospholipase activity	102	0.557975	1.40792	0.0099889	0.0163233	0.00555651	7600	tags=51%, list=20%, signal=41%	PLCG1/PLBD2/HMOX1/SMPD1/PLA2G2A/EDNRA/PLBD1/PLD2/SMPD4/PLA2G15/MGLL/PLA1A/GDPD5/PNPLA6/ENPP2/PLCE1/PLCL2/PGAP6/CCR1/PITPNM3/PLD1/LPL/PLCB1/SMPD3/PLCB2/PLCG2/ABHD6/PLCB4/BDKRB2/PLD3/SEC23IP/NOTUM/PLCD3/PLA2G7/PLD4/PLCD1/DDHD2/GDE1/PLCH2/CHRM3/CCR5/PNPLA3/PLA2G1B/PLCH1/PLA2G5/PLCB3/ABHD3/GPLD1/PLCL1/PLAAT5/DDHD1/NAPEPLD
GO:0015276	ligand-gated ion channel activity	138	0.523455	1.35721	0.010661	0.0171429	0.00583548	11033	tags=44%, list=29%, signal=31%	ITPR3/RASA3/ANXA6/SHROOM2/ITPR2/KCNJ12/AQP1/TPCN1/GRIK5/ASIC1/SCNN1A/JPH2/PKD2/JPH4/ITPR1/KCNJ5/SCNN1G/P2RX7/KCNK6/RYR1/PTK2B/TPCN2/SCNN1B/CHRNB1/GRIK4/KCNJ8/P2RX2/JPH3/P2RX4/MCOLN3/CHRNA1/TRPM2/MCOLN1/CNGA4/HCN4/KCNJ14/ASIC2/GRIN2D/GABRB2/GRIN2A/GABRR1/GABRA3/KCNJ15/P2RX1/GABRB3/KCNJ2/GRIN3B/CHRNA6/GRIK2/KCNK1/GRIK3/CHRNB4/KCNJ11/SLC17A7/GRIA3/GRID1/CHRNG/GRIN2C/KCNJ10/JPH1/HCN2
GO:0022834	ligand-gated channel activity	138	0.523455	1.35721	0.010661	0.0171429	0.00583548	11033	tags=44%, list=29%, signal=31%	ITPR3/RASA3/ANXA6/SHROOM2/ITPR2/KCNJ12/AQP1/TPCN1/GRIK5/ASIC1/SCNN1A/JPH2/PKD2/JPH4/ITPR1/KCNJ5/SCNN1G/P2RX7/KCNK6/RYR1/PTK2B/TPCN2/SCNN1B/CHRNB1/GRIK4/KCNJ8/P2RX2/JPH3/P2RX4/MCOLN3/CHRNA1/TRPM2/MCOLN1/CNGA4/HCN4/KCNJ14/ASIC2/GRIN2D/GABRB2/GRIN2A/GABRR1/GABRA3/KCNJ15/P2RX1/GABRB3/KCNJ2/GRIN3B/CHRNA6/GRIK2/KCNK1/GRIK3/CHRNB4/KCNJ11/SLC17A7/GRIA3/GRID1/CHRNG/GRIN2C/KCNJ10/JPH1/HCN2
GO:0009055	electron transfer activity	110	-0.669358	-2.16382	0.0107527	0.0171531	0.00583897	3810	tags=54%, list=10%, signal=48%	SRD5A1/COX7A2L/FDX1/PTGES2/IDH3B/COX6A2/ADH5/AKR1A1/NDUFA4L2/PHGDH/UQCRFS1/QDPR/GLRX3/ETFA/SDHA/GSR/COX7A2P2/NOX4/DHRS3/UQCRC1/SDHB/SH3BGRL3/DHDH/SURF1/NDUFA4/GLRX5/ETFB/SDHD/C15orf48/TSTA3/CYCS/NQO1/FDX2/GLRX2/NDUFAF2/UQCRHL/NDUFS3/NDUFA12/CYC1/NDUFV2/COX5A/COX6A1/COX4I1/UQCRH/MTCO2P12/CYBA/IDO1/COX6B1/UQCRB/UQCR10/UQCR11/COX8A/COX7C/COX6C/NDUFS6/COX7A2/UQCRQ/COX5B/COX7B
GO:0031625	ubiquitin protein ligase binding	290	0.470297	1.25667	0.0112474	0.0178011	0.00605954	6979	tags=42%, list=19%, signal=34%	NKD2/SKI/EGR2/TNFRSF1B/POLR2A/PXN/PINK1/TXNIP/CDKN1A/HSPA8/WFS1/KDM4A/TRIB2/EGFR/CASC3/NEK6/AXIN2/SRC/PER3/BOK/SMAD3/BECN1/RNF40/MFN2/GABARAPL1/JAK1/CUL9/TRAF3/RNF31/NGFR/APBB1/AMBRA1/LTBR/PER1/CUL7/BCL2/GSK3B/VCL/SYT11/HDAC6/ACVR1B/HERC2/DTX1/TRAF5/SMAD7/UBXN7/ATF6/ERLIN1/NLK/NPLOC4/SNCAIP/SMG5/USP19/RFFL/RB1/RNF20/SNX9/JUN/FOXO1/LYN/TOLLIP/TNK2/ARRB1/MDM2/MID1/PRKACB/PRKAR1A/MUL1/RIPK1/SLF2/SPA…
GO:0015078	proton transmembrane transporter activity	128	-0.489228	-1.59273	0.0144928	0.0225817	0.0076869	2487	tags=29%, list=7%, signal=27%	ATP5F1B/ATP5F1A/ATP6V1G2/COX7A2P2/MFSD3/ATP6V1E1/ATP5PB/SURF1/ATP6V1G1/NDUFA4/ATP6V0E1/C15orf48/ATP6V0B/ATP5F1C/ATP5PF/ATP5F1EP2/COX5A/ATP5MC2/COX6A1/ATP5MC3/ATP5F1E/ATP6V1F/ATP5PO/COX4I1/MTCO2P12/ATP5MG/ATP5F1D/COX6B1/ATP5PD/ATP5MC1/COX8A/COX7C/COX6C/COX7A2/COX5B/COX7B/ATP5ME
GO:0016747	transferase activity, transferring acyl groups other than amino-acyl groups	232	0.486927	1.29497	0.014433	0.0225817	0.0076869	7931	tags=41%, list=21%, signal=32%	LPCAT3/MCM3AP/USP22/CREBBP/HCFC1/NATD1/EP300/NCOA3/SPTLC1/KANSL1/ZDHHC7/FASN/AGPAT3/CERS4/ZDHHC8/KAT6A/ELOVL5/ZDHHC5/NAT8L/PLA2G15/LPGAT1/SRCAP/NCOA1/TAF1/HGSNAT/CERS6/KANSL3/YKT6/GPAT4/DLST/SPHK1/SPTLC2/ZDHHC18/AGPAT4/KAT6B/EPC2/ZDHHC4/HHAT/GPAM/BRPF1/GTF3C4/LPCAT1/NAA40/TAF5L/ZDHHC14/CROT/SOAT1/ZDHHC3/GLUL/MBOAT2/AGPAT1/OGT/PHF10/ELOVL2/KAT14/KAT2A/ZDHHC1/NAT10/KAT7/ZDHHC9/TADA2B/EPC1/KAT5/LPCA…
GO:0016887	ATPase activity	432	0.450211	1.21649	0.0170512	0.0263637	0.00897429	7989	tags=43%, list=21%, signal=34%	RECQL/KIF1A/MYO9B/EP400/MYO1D/RHOBTB3/SMARCA2/KIF1B/MACF1/KIFC3/HSPA8/MYH10/SNRNP200/KIF1C/UPF1/MYO1C/CHD6/CHD3/ABCC1/NAV2/KIF2A/SMARCA4/CHD8/KIF13B/ABCA2/SLFN11/HELZ2/DHX37/MYH9/ABCC10/KIF3C/MYO1B/DHX38/DHX8/ATF7IP/CHD4/KIF13A/DYNC1H1/MYH14/SRCAP/PMS2/KIF7/CHTF8/KIF3B/PBRM1/ERCC2/DHX57/TOR4A/BTAF1/ATP1A2/RNF213/KIF5C/SMARCA1/DHX16/ABCA3/ATP13A2/INO80/TNNT3/FBH1/SKIV2L/DDX54/VPS4B/ABCA1/HELZ/FIGN…
GO:0005261	cation channel activity	336	0.45947	1.2329	0.0172065	0.0264008	0.00898691	8457	tags=38%, list=23%, signal=29%	PIEZO1/ITPR3/RASA3/TRPV4/KCNQ1/ANXA6/ANO1/CACNG4/SHROOM2/CACNA1H/ITPR2/ANO6/KCNE4/TMEM63A/KCNC3/PKD1/KCNJ12/AQP1/TPCN1/GRIK5/TMEM37/ORAI2/ASIC1/SLC24A3/SCNN1A/KCNAB2/JPH2/PKD2/SLC4A11/KCND1/JPH4/SEC61A1/ITPR1/KCNK3/CACNA1G/TRPV2/KCNIP1/CACNB3/PANX1/CACNA1C/ITGAV/KCNG1/KCNJ5/KCNS1/SCNN1G/TMEM63B/SLC24A1/PSEN1/TMEM38A/ABCC9/CACHD1/KCNMA1/TSPOAP1/KCNK2/KCNK13/P2RX7/MTMR6/KCNK6/RYR1/PTK2B/TPCN2/PIEZO…
GO:0003735	structural constituent of ribosome	184	-0.895573	-3.03904	0.0212766	0.0323985	0.0110285	3227	tags=79%, list=9%, signal=72%	MRPL46/MRPS30/MRPS31/RPLP0P6/MRPS11/RNA5-8SN2/RPLP0/MRPS18B/MRPL9/RPL3/MRPS16/MRPS14/MRPS25/MRPL37/RPS10P5/MRPS2/MRPL51/RPL6/MRPS17/MRPL4/MRPL28/MRPS18A/MRPL3/MRPS22/RPS27L/MRPS7/MRPL32/MRPL18/MRPS23/MRPL43/RPS12/RPL37AP8/RPL21/RSL24D1/RPL13A/RNA5S9/RPL22/MRPL16/RPL7/MRPS18C/RPL23A/RPL5/RPL41/RPS2/RPL15/RPSA/MRPS24/RPL19/MRPS12/RPL10A/MRPS34/RPS3A/MRPL17/MRPL20/MRPL23/RPL23/RPS27A/MRPL15/MRPS6/MR…
GO:0042826	histone deacetylase binding	111	0.525202	1.33148	0.025247	0.0381552	0.0129882	8480	tags=56%, list=23%, signal=43%	CCND1/NCOR2/GLI3/HIC1/DACT1/KLF4/TCF21/NRIP1/SP2/MEF2A/BCOR/MEF2D/NACC2/LEF1/HDAC4/CHD4/HOXA10/HDAC5/HDAC6/NCOR1/CAMTA2/CRY1/UHRF1BP1/PRDM1/SMG5/WDTC1/AKAP8L/RARA/SRF/MEF2C/SUDS3/SP1/SIX3/HIF1A/ZBTB7B/BHLHE41/KAT2A/TOP2B/TRAF6/MIER2/MTA2/PARP1/ANKRD1/PRKN/MTA1/NIPBL/PKN2/HES1/MYOCD/CBX5/KAT2B/SFPQ/MIER3/KCTD21/NKX3-1/AKAP8/SIRT2/RAC1/HDAC1/NR2C1/HDAC3/NUDT21
GO:0003774	motor activity	136	0.511127	1.32499	0.0267666	0.0401499	0.0136672	9259	tags=51%, list=25%, signal=39%	KIF26B/KIF1A/MYO9B/MYO1D/DYNC1LI2/KIF1B/KIFC3/MYH10/MYH11/KIF1C/MYO1C/KIF2A/CGN/KIF13B/MYH9/KIF3C/MYO1B/MYO5B/KIF13A/DYNC1H1/MYH14/KIF26A/KIF7/KIF3B/CGNL1/DCTN1/MYO1F/KIF5C/MYO5A/MYO1E/MYO10/DNAH2/CCDC102A/KIF16B/DNAH1/APPBP2/KLC2/BBS4/MYO19/KIF5A/KIF5B/DNAI1/STARD9/MYO5C/WDR63/KIF21B/MYO1G/DYNC2H1/DNHD1/DYNC1I2/DNAL1/MYH7B/MYO9A/KIF17/DNAI2/KIF19/MYO7A/DNAH9/DYNLT3/DYNC1I1/KIF18B/DNAH6/KLC4/MYH6…
GO:0051082	unfolded protein binding	130	-0.383868	-1.25337	0.0289855	0.0431562	0.0146905	4911	tags=32%, list=13%, signal=27%	DNAJA2/GRPEL2/CCT7/AAMP/NDUFAF1/CCT5/DNAJB1/CHAF1A/PTGES3/CCT2/DNAJB11/MKKS/CLN3/CCT8/SIL1/PPIB/DNAJB13/NUDCD2/PPIG/TUBB4B/GRPEL1/RUVBL2/TTC1/NPM1/DNAJB5/PPIF/PFDN1/DNAJC4/AIP/PPIA/HSPA1B/HSPA1A/PFDN5/PFDN6/PPIH/CLU/PFDN2/PFDN4/HSPE1/PET100/CLGN
GO:0044389	ubiquitin-like protein ligase binding	308	0.452766	1.21081	0.0295918	0.043735	0.0148875	6979	tags=41%, list=19%, signal=34%	NKD2/SKI/EGR2/TNFRSF1B/POLR2A/PXN/PINK1/TXNIP/CDKN1A/HSPA8/WFS1/KDM4A/TRIB2/EGFR/CASC3/NEK6/AXIN2/SRC/PER3/STAT2/BOK/SMAD3/BECN1/RNF40/MFN2/GABARAPL1/JAK1/CUL9/TRAF3/RNF31/NGFR/APBB1/AMBRA1/LTBR/PER1/CUL7/BCL2/GSK3B/VCL/SYT11/HDAC6/ACVR1B/HERC2/DTX1/TRAF5/SMAD7/UBXN7/ATF6/ERLIN1/NLK/NPLOC4/ITCH/SNCAIP/SMG5/USP19/RFFL/RB1/RNF20/SNX9/JUN/FOXO1/LYN/TOLLIP/TNK2/ARRB1/MDM2/MID1/PRKACB/PRKAR1A/MUL1/RIP…
